# Supplementary material
Source: MDPI journal article supplement (https://www.mdpi.com/2075-163X/13/3/326)
Supplement: s1 [file s1]

**Table S1.** Compilation of published whole-rock major (in wt.%) and trace element (in ppm) data for mafic dykes in Chinese South Tianshan.

| Sample    | LOI  | Total  | Sc   | V    | Cr   | Co   | Ni   | Rb    | Sr   | Ba    | Y    | Nb    | Ta   | Zr  | Hf   | Pb    | Th   | U    | La    | Ce    | Pr   | Nd    | Sm   | Eu   | Gd   | Tb    | Dy   | Ho   | Er   | Tm   | Yb   | Lu   | Y    | References             |
|-----------|------|--------|------|------|------|------|------|-------|------|-------|------|-------|------|-----|------|-------|------|------|-------|-------|------|-------|------|------|------|-------|------|------|------|------|------|------|------|------------------------|
| AKS01-1   | 1.9  | 100.1  | n.a. | 166  | 8.67 | n.a. | 6.43 | 40.9  | 334  | 2938  | 43.5 | 7.85  | 0.44 | 233 | 5.43 | n.a.  | 3.35 | 0.7  | 42.5  | 91.2  | 12.4 | 54.2  | 10.9 | 3.1  | 10.5 | 1.54  | 8.44 | 1.69 | 4.6  | 0.62 | 3.99 | 0.6  | 43.5 | Zhang et al., 2009 [1] |
| AKS01-2   | 1.63 | 99.9   | n.a. | 174  | 11   | n.a. | 6.7  | 44.2  | 321  | 2872  | 42.8 | 7.83  | 0.46 | 234 | 5.45 | n.a.  | 3.4  | 0.69 | 41.8  | 90.3  | 12.2 | 53.6  | 10.7 | 3.13 | 10.4 | 1.51  | 8.43 | 1.7  | 4.57 | 0.63 | 3.98 | 0.61 | 42.8 | Zhang et al., 2009 [1] |
| AKS02-1   | 2.04 | 100.2  | n.a. | 168  | 11.6 | n.a. | 6.69 | 42    | 409  | 2923  | 42.1 | 7.72  | 0.44 | 225 | 5.25 | n.a.  | 3.24 | 0.65 | 39.4  | 85.8  | 11.6 | 51.8  | 10.4 | 2.9  | 10   | 1.5   | 8.19 | 1.6  | 4.44 | 0.59 | 3.84 | 0.59 | 42.1 | Zhang et al., 2009 [1] |
| AKS02-2   | 1.9  | 99.84  | n.a. | 155  | 15.7 | n.a. | 9.69 | 37.3  | 411  | 3216  | 42.2 | 7.81  | 0.44 | 228 | 5.43 | n.a.  | 3.29 | 0.64 | 41    | 86.9  | 12   | 53.1  | 10.5 | 2.87 | 10.2 | 1.48  | 8.12 | 1.61 | 4.4  | 0.62 | 3.89 | 0.59 | 42.2 | Zhang et al., 2009 [1] |
| AKS02-3   | 1.66 | 99.74  | n.a. | 171  | 8.21 | n.a. | 7.08 | 44.4  | 425  | 2703  | 43.1 | 7.87  | 0.44 | 227 | 5.25 | n.a.  | 3.23 | 0.61 | 40.8  | 89.2  | 12.1 | 53.7  | 10.7 | 3.19 | 10.4 | 1.52  | 8.33 | 1.66 | 4.5  | 0.62 | 3.94 | 0.59 | 43.1 | Zhang et al., 2009 [1] |
| AKS05-1   | 1.66 | 99.7   | n.a. | 173  | 9.42 | n.a. | 6.59 | 45.6  | 402  | 2661  | 43.9 | 7.97  | 0.45 | 235 | 5.48 | n.a.  | 3.39 | 0.61 | 42.8  | 90.9  | 12.3 | 54    | 10.8 | 3.29 | 10.4 | 1.51  | 8.28 | 1.68 | 4.58 | 0.63 | 3.94 | 0.6  | 43.9 | Zhang et al., 2009 [1] |
| AKS05-2   | 1.66 | 99.81  | n.a. | 246  | 5.56 | n.a. | 4.86 | 29.9  | 602  | 3085  | 43.2 | 7.14  | 0.41 | 207 | 4.82 | n.a.  | 2.9  | 0.53 | 38    | 85.1  | 11.9 | 53.1  | 10.9 | 3.05 | 10.6 | 1.56  | 8.31 | 1.69 | 4.41 | 0.62 | 3.79 | 0.57 | 43.2 | Zhang et al., 2009 [1] |
| 12T1031   | 1.38 | 97.65  | n.a. | n.a. | 8.84 | n.a. | 7.66 | 34.3  | 559  | 2715  | 44.1 | 8.03  | 0.52 | 225 | 5.97 | 10.7  | 3.68 | 0.74 | 43.9  | 92.1  | 12.9 | 55.1  | 11.2 | 5.29 | 11.1 | 1.61  | 9.3  | 1.84 | 4.98 | 0.65 | 4.42 | 0.69 | 44.1 | Cai et al., 2022 [2]   |
| 12T1032   | 1.65 | 97.86  | n.a. | n.a. | 10.7 | n.a. | 9.27 | 34.8  | 518  | 2459  | 42.9 | 7.78  | 0.46 | 204 | 5.4  | 8.17  | 2.95 | 0.71 | 39.1  | 82.8  | 12.1 | 54.4  | 10.9 | 5.18 | 11   | 1.55  | 8.74 | 1.73 | 4.64 | 0.6  | 4.11 | 0.62 | 42.9 | Cai et al., 2022 [2]   |
| 12T1033   | 1.43 | 98.05  | n.a. | n.a. | 10.6 | n.a. | 9.07 | 34    | 542  | 2816  | 46.9 | 8.31  | 0.49 | 230 | 5.81 | 9.36  | 3.38 | 0.65 | 43.4  | 89.7  | 12.8 | 57.3  | 11.5 | 5.33 | 11.2 | 1.6   | 9.23 | 1.82 | 4.9  | 0.64 | 4.27 | 0.66 | 46.9 | Cai et al., 2022 [2]   |
| 18SK03-2  | 3.22 | 99.9   | 29.7 | 362  | 54   | 34.6 | 52.2 | 20.6  | 494  | 404   | 29.9 | 16.6  | 1.01 | 184 | 4.5  | 3.9   | 2.27 | 0.53 | 22.4  | 50.9  | 6.24 | 26.5  | 6.68 | 2.08 | 6.39 | 0.96  | 5.58 | 1.1  | 2.95 | 0.4  | 2.41 | 0.34 | 29.9 | Cai et al., 2022 [2]   |
| A18SK03-3 | 5.14 | 100.27 | 28.6 | 349  | 49   | 40.9 | 51.5 | 27.4  | 515  | 479   | 30.7 | 16.7  | 1.04 | 188 | 4.6  | 7.9   | 2.37 | 0.57 | 24    | 54.7  | 6.66 | 27.3  | 7.03 | 2.05 | 6.57 | 1.05  | 6.12 | 1.19 | 3    | 0.43 | 2.66 | 0.42 | 30.7 | Cai et al., 2022 [2]   |
| 18SK03-4  | 4.69 | 100.12 | 28.7 | 347  | 49   | 45.8 | 53.8 | 18.3  | 495  | 321   | 29.6 | 16.4  | 0.99 | 185 | 4.3  | 32.7  | 2.16 | 0.42 | 24.3  | 53.7  | 6.59 | 27.2  | 6.94 | 2.15 | 6.95 | 0.93  | 5.55 | 1.12 | 2.77 | 0.39 | 2.35 | 0.34 | 29.6 | Cai et al., 2022 [2]   |
| 18SK03-5  | 5.22 | 100.42 | 33.1 | 381  | 59   | 38.4 | 50.4 | 2.2   | 51   | 75.9  | 37.9 | 19.1  | 1.16 | 197 | 4.8  | 7.2   | 2.43 | 1.43 | 20.3  | 48.4  | 5.9  | 25.9  | 6.59 | 1.52 | 6.59 | 1.1   | 6.57 | 1.34 | 3.45 | 0.46 | 2.59 | 0.37 | 37.9 | Cai et al., 2022 [2]   |
| 18SK03-6  | 5.15 | 99.89  | 32.2 | 427  | 63   | 45.4 | 59.5 | 1.2   | 41.6 | 100   | 34.5 | 18.9  | 1.13 | 194 | 4.8  | 6.5   | 2.29 | 1.29 | 18.4  | 42.9  | 5.35 | 22.2  | 6.05 | 1.45 | 6.36 | 1.09  | 6.41 | 1.21 | 3.05 | 0.4  | 2.32 | 0.31 | 34.5 | Cai et al., 2022 [2]   |
| 18SK04-1  | 5.32 | 99.67  | 30   | 355  | 64   | 45.8 | 56.2 | 13.6  | 379  | 203   | 31.2 | 18.5  | 1.05 | 197 | 4.9  | 298   | 2.15 | 0.52 | 25.8  | 59.1  | 7.1  | 29.4  | 6.98 | 2.19 | 6.56 | 1.03  | 5.89 | 1.14 | 3.01 | 0.42 | 2.53 | 0.39 | 31.2 | Cai et al., 2022 [2]   |
| 18SK04-3  | 5.26 | 100.03 | 28.1 | 358  | 52   | 41.2 | 49.8 | 19.2  | 470  | 299   | 28.4 | 17.2  | 0.97 | 180 | 4.4  | 27.4  | 2.02 | 0.51 | 22.7  | 49.2  | 6.01 | 25.2  | 6.26 | 2.08 | 6.27 | 0.99  | 5.15 | 1.04 | 2.65 | 0.37 | 2.23 | 0.33 | 28.4 | Cai et al., 2022 [2]   |
| 18SK04-4  | 4.09 | 99.78  | 24.3 | 342  | 33   | 43.2 | 48.5 | 12.2  | 353  | 205   | 30.9 | 17.4  | 0.99 | 192 | 4.7  | 66.1  | 2.39 | 0.57 | 22.7  | 51.3  | 6.13 | 27.36 | 9.6  | 2.2  | 6.76 | 1     | 5.91 | 1.22 | 3.26 | 0.43 | 2.63 | 0.41 | 30.9 | Cai et al., 2022 [2]   |
| 19AKS13   | 4.37 | 99.79  | 30.3 | 389  | 47   | 43.7 | 55.5 | 23.4  | 497  | 345   | 29.6 | 17.7  | 0.93 | 174 | 4.5  | 7.3   | 2.02 | 0.46 | 25.1  | 51.6  | 6.02 | 25    | 6.31 | 2.09 | 6.35 | 1.01  | 5.81 | 1.13 | 3.01 | 0.41 | 2.49 | 0.37 | 29.6 | Cai et al., 2022 [2]   |
| 19AKS14   | 3.19 | 99.42  | 30.7 | 358  | 55   | 45.9 | 59   | 13.3  | 637  | 1115  | 26.4 | 16.50 | 0.93 | 166 | 4.2  | 3.9   | 1.93 | 0.47 | 21.6  | 47    | 5.73 | 22.8  | 5.9  | 1.79 | 5.79 | 0.94  | 5.33 | 1.05 | 2.77 | 0.39 | 2.32 | 0.33 | 26.4 | Cai et al., 2022 [2]   |
| 19AKS10   | 4    | 99.6   | 30.7 | 370  | 45   | 45.4 | 60.9 | 16.9  | 634  | 628   | 28.1 | 18.3  | 1.05 | 177 | 4.5  | 5.7   | 2.24 | 0.46 | 23.4  | 54.1  | 6.29 | 25.3  | 6.37 | 2.18 | 6.11 | 0.98  | 5.65 | 1.08 | 2.84 | 0.4  | 2.42 | 0.38 | 28.1 | Cai et al., 2022 [2]   |
| 19AKS11-1 | 3.78 | 100.05 | 27.8 | 299  | 57   | 43.5 | 64.1 | 15.3  | 431  | 259   | 26.6 | 16    | 0.93 | 165 | 4.1  | 10.6  | 2.03 | 0.45 | 21.7  | 47.35 | 29   | 22.8  | 5.97 | 1.93 | 5.62 | 0.92  | 5.34 | 1.05 | 2.64 | 0.36 | 2.24 | 0.34 | 26.6 | Cai et al., 2022 [2]   |
| 19AKS11-2 | 3.61 | 100.05 | 29.6 | 360  | 42   | 44.9 | 55.2 | 19.5  | 482  | 420   | 31.9 | 19.61 | 1.12 | 203 | 5.1  | 9     | 2.47 | 0.55 | 27.6  | 57.96 | 38   | 27.2  | 6.8  | 2.11 | 6.6  | 1.08  | 6.26 | 1.25 | 3.13 | 0.43 | 2.68 | 0.41 | 31.9 | Cai et al., 2022 [2]   |
| 19AKS01-1 | 4.97 | 99.48  | 17.7 | 219  | 21   | 48   | 75   | 37.5  | 364  | 988   | 30.2 | 26.2  | 1.58 | 231 | 5.4  | 30.2  | 2.69 | 0.63 | 31.3  | 69.4  | 8.02 | 34.48 | 14   | 2.61 | 6.99 | 1.12  | 6.01 | 1.21 | 3.02 | 0.42 | 2.49 | 0.36 | 30.2 | Cai et al., 2022 [2]   |
| 19AKS01-4 | 5.22 | 99.7   | 17   | 218  | 27   | 50.5 | 86.3 | 33.2  | 359  | 914   | 28.5 | 25.6  | 1.44 | 223 | 5.3  | 26.4  | 2.64 | 0.59 | 27.8  | 64.6  | 7.98 | 31.1  | 7.74 | 2.52 | 6.72 | 1.06  | 5.88 | 1.18 | 2.89 | 0.39 | 2.31 | 0.33 | 28.5 | Cai et al., 2022 [2]   |
| 19AKS38   | 2.66 | 99.82  | 38.3 | 501  | 31   | 24.8 | 35.3 | 5.5   | 250  | 198   | 49.7 | 20.2  | 1.1  | 230 | 5.5  | 1.5   | 2.26 | 0.59 | 25.9  | 60.9  | 7.68 | 34.6  | 9.29 | 2.94 | 9.61 | 1.52  | 9.1  | 1.83 | 4.94 | 0.69 | 4.14 | 0.61 | 49.7 | Cai et al., 2022 [2]   |
| 19AKS39   | 1.57 | 100.09 | 41.4 | 441  | 24   | 45.7 | 36.8 | 20.4  | 233  | 278   | 43   | 14.3  | 0.86 | 183 | 4.7  | 7.8   | 2.29 | 0.47 | 19.8  | 45.6  | 5.57 | 24.3  | 6.86 | 2.26 | 7.44 | 1.28  | 7.74 | 1.66 | 4.58 | 0.65 | 3.99 | 0.61 | 43   | Cai et al., 2022 [2]   |
| 18SG01    | 8.57 | 98.84  | 18   | 253  | 26   | 42.9 | 62.4 | 0.9   | 92.1 | 121.1 | 32   | 16.91 | 0.51 | 190 | 4.4  | 7.1   | 1.78 | 0.48 | 20.54 | 9.26  | 21   | 27.77 | 31   | 2.26 | 7.66 | 1.13  | 6.15 | 1.11 | 2.79 | 0.38 | 2.22 | 0.32 | 32   | Cai et al., 2022 [2]   |
| 19AKS21   | 8.64 | 99.66  | 17.8 | 247  | 23   | 35.7 | 57.8 | 4.4   | 175  | 154   | 28.2 | 16.6  | 0.95 | 174 | 4.1  | 5.8   | 1.77 | 0.5  | 25.2  | 55.9  | 6.38 | 27.46 | 82   | 2.08 | 6.66 | 0.98  | 5.66 | 1.08 | 2.78 | 0.36 | 2.15 | 0.32 | 28.2 | Cai et al., 2022 [2]   |
| 18YM04-1  | 3.79 | 99.5   | 47   | 400  | 53.8 | 33.1 | 24.1 | 139.5 | 158  | 356   | 39.8 | 5.3   | 0.31 | 153 | 3.87 | 2.5   | 1.3  | 0.7  | 20    | 46.4  | 6.35 | 29.5  | 6.93 | 2.59 | 7.43 | 1.22  | 7.21 | 1.43 | 4    | 0.57 | 3.55 | 0.54 | 39.8 | Cai et al., 2022 [2]   |
| 18YM04-2  | 4.29 | 99.34  | 45.7 | 395  | 54.6 | 33.3 | 23   | 37.6  | 202  | 397   | 38.8 | 5.17  | 0.3  | 147 | 3.72 | 1.55  | 1.26 | 0.59 | 19.1  | 44.8  | 6.28 | 29.3  | 7.06 | 2.73 | 7.55 | 1.21  | 7.45 | 1.41 | 4.07 | 0.56 | 3.5  | 0.51 | 38.8 | Cai et al., 2022 [2]   |
| 18YM04-3  | 4.32 | 99.68  | 45.3 | 391  | 52.5 | 30.4 | 21.5 | 36    | 151  | 311   | 37.6 | 5.110 | 0.31 | 144 | 3.76 | 1.72  | 1.25 | 0.55 | 18.8  | 43.5  | 6.12 | 27.96 | 72   | 2.42 | 7.17 | 1.177 | 12.1 | 34   | 3.88 | 0.52 | 3.43 | 0.52 | 37.6 | Cai et al., 2022 [2]   |
| 18YM06-1  | 8.27 | 99.27  | 49.3 | 415  | 72   | 57.9 | 51.9 | 9.63  | 491  | 479   | 38.8 | 5.61  | 0.34 | 146 | 4.7  | 72.70 | 74   | 0.33 | 16.6  | 38.1  | 5.32 | 25.4  | 6.39 | 2.43 | 7.24 | 1.18  | 7.17 | 1.34 | 3.9  | 0.54 | 3.44 | 0.5  | 38.8 | Cai et al., 2022 [2]   |
| 18YM06-2  | 5.68 | 99.57  | 49.7 | 423  | 73.8 | 71.4 | 52.9 | 7.96  | 376  | 388   | 37.6 | 5.730 | 0.35 | 167 | 4.41 | 78.3  | 0.76 | 0.32 | 19.4  | 43.9  | 5.98 | 27.6  | 6.73 | 2.34 | 7.34 | 1.19  | 7.1  | 1.31 | 3.59 | 0.52 | 3.2  | 0.46 | 37.6 | Cai et al., 2022 [2]   |
| 18YM06-3  | 9.54 | 99.23  | 50   | 428  | 70   | 54.4 | 48.5 | 5.76  | 457  | 277   | 43.2 | 5.440 | 0.33 | 161 | 4.23 | 64.40 | 72   | 0.23 | 17.8  | 40.7  | 5.61 | 26.6  | 6.53 | 2.42 | 7.56 | 1.27  | 7.8  | 1.5  | 4.39 | 0.6  | 3.74 | 0.54 | 43.2 | Cai et al., 2022 [2]   |
| 18YM07-2  | 4.09 | 99.45  | 49.8 | 415  | 76.7 | 47.2 | 51.4 | 6.4   | 399  | 326   | 39.2 | 5.2   | 0.32 | 157 | 4.21 | 8.06  | 0.68 | 0.18 | 14.7  | 35.6  | 4.98 | 24.3  | 6.32 | 2.35 | 7.05 | 1.16  | 7.33 | 1.44 | 3.98 | 0.58 | 3.61 | 0.54 | 39.2 | Cai et al., 2022 [2]   |
| 18YM07-3  | 4.34 | 99.76  | 50.7 | 434  | 69.7 | 45.9 | 46.3 | 7.21  | 400  | 330   | 39.7 | 5.28  | 0.34 | 162 | 4.24 | 7.58  | 0.74 | 0.25 | 15.6  | 37.9  | 5.28 | 25.3  | 6.69 | 2.48 | 7.29 | 1.2   | 7.58 | 1.47 | 4.23 | 0.58 | 3.69 | 0.55 | 39.7 | Cai et al., 2022 [2]   |

| Sample     | LOI Total | Sc   | V   | Cr   | Co     | Ni   | Rb   | Sr       | Ba   | Y     | Nb    | Ta      | Zr    | Hf   | Pb    | Th   | U    | La    | Ce   | Pr     | Nd   | Sm   | Eu   | Gd   | Tb   | Dy    | Ho   | Er   | Tm    | Yb   | Lu   | Y                     | References            |
|------------|-----------|------|-----|------|--------|------|------|----------|------|-------|-------|---------|-------|------|-------|------|------|-------|------|--------|------|------|------|------|------|-------|------|------|-------|------|------|-----------------------|-----------------------|
| 18YM07-4   | 3.3999.97 | 48.7 | 414 | 70.8 | 44     | 45.3 | 4.12 | 399      | 350  | 40.1  | 5.290 | 33160   | 4.146 | 99   | 0.69  | 0.22 | 15.4 | 37.55 | 28   | 25.4   | 6.38 | 2.4  | 7.07 | 1.18 | 7.59 | 1.434 | 25   | 0.57 | 3.62  | 0.53 | 40.1 | Cai et al., 2022 [2]  |                       |
| 18YM08-1   | 6.2299.88 | 38.6 | 294 | 9.93 | 27.1   | 9.26 | 4.35 | 166      | 127  | 60.18 | 0.08  | 0.4619  | 34.81 | 211  | 0.92  | 0.36 | 32.3 | 77.7  | 11.1 | 54.212 | 7.4  | 46   | 13.1 | 1.92 | 11.8 | 2.16  | 6.02 | 0.76 | 4.87  | 0.73 | 60.1 | Cai et al., 2022 [2]  |                       |
| 18YM08-3   | 6.7699.66 | 39.2 | 287 | 8.95 | 38.5   | 9.71 | 5.19 | 182      | 238  | 65.2  | 8.1   | 0.4919  | 4.83  | 104  | 0.92  | 0.34 | 36   | 85.1  | 12.1 | 59     | 14.1 | 4.95 | 14.2 | 2.1  | 13   | 2.376 | 45   | 0.85 | 5.110 | 75   | 65.2 | Cai et al., 2022 [2]  |                       |
| 18YM08-11  | 6.2499.54 | 38.5 | 277 | 9.35 | 28.6   | 12.5 | 2.96 | 220      | 417  | 59.9  | 7.9   | 0.45185 | 4.8   | 415  | 0.860 | 45   | 32.7 | 74.6  | 10.6 | 51.5   | 12.5 | 4.03 | 12.6 | 1.89 | 11.5 | 2.22  | 6.12 | 0.8  | 5.04  | 0.73 | 59.9 | Cai et al., 2022 [2]  |                       |
| LKXDJ-3-1  | 7.69 99.8 | 1026 | 179 | 816  | 42.6   | 188  | 44.4 | 10261961 | 20.8 | 7.28  | 0.34  | 158     | 3.49  | 20.0 | 12.0  | 1.86 | 85.8 | 175   | 19.3 | 71.5   | 10.6 | 2.75 | 7.54 | 0.93 | 4.20 | 0.71  | 1.96 | 0.26 | 1.72  | 0.28 | 20.8 | Deng et al., 2017 [3] |                       |
| LKXDJ-3-3  | 7.47 99.8 | 1027 | 178 | 816  | 41.8   | 179  | 43.3 | 10271975 | 21.0 | 7.09  | 0.35  | 156     | 3.58  | 20.4 | 11.8  | 1.89 | 84.5 | 176   | 19.5 | 72.0   | 10.9 | 2.75 | 8.01 | 0.94 | 4.23 | 0.74  | 2.05 | 0.27 | 1.73  | 0.28 | 21.0 | Deng et al., 2017 [3] |                       |
| LKXDJ-3-4  | 7.83 99.8 | 1031 | 183 | 838  | 42.8   | 186  | 43.9 | 10312022 | 20.5 | 7.04  | 0.35  | 153     | 3.51  | 23.2 | 12.1  | 1.91 | 79.1 | 169   | 18.9 | 70.1   | 10.5 | 2.66 | 7.81 | 0.94 | 4.17 | 0.72  | 1.97 | 0.27 | 1.71  | 0.29 | 20.5 | Deng et al., 2017 [3] |                       |
| LKXDJ-6-1  | 3.14 99.8 | 984  | 148 | 507  | 32.3   | 137  | 52.7 | 984      | 1678 | 18.6  | 8.13  | 0.41    | 189   | 4.47 | 8.75  | 7.55 | 0.86 | 52.6  | 111  | 13.0   | 48.1 | 7.63 | 2.05 | 5.87 | 0.74 | 3.63  | 0.65 | 1.75 | 0.24  | 1.62 | 0.27 | 18.6                  | Deng et al., 2017 [3] |
| LKXDJ-6-3  | 3.67 99.8 | 954  | 146 | 489  | 31.9   | 128  | 47.7 | 954      | 1657 | 18.3  | 8.66  | 0.45    | 195   | 4.23 | 8.95  | 8.29 | 1.16 | 55.6  | 117  | 13.4   | 49.4 | 7.49 | 2.03 | 5.81 | 0.76 | 3.58  | 0.63 | 1.79 | 0.25  | 1.63 | 0.27 | 18.3                  | Deng et al., 2017 [3] |
| LKXDJ-6-4  | 3.95 99.8 | 940  | 147 | 545  | 33.9   | 141  | 49.2 | 940      | 1550 | 18.5  | 8.09  | 0.42    | 185   | 4.40 | 7.96  | 7.82 | 1.02 | 55.1  | 116  | 13.3   | 49.1 | 7.65 | 2.04 | 5.91 | 0.76 | 3.63  | 0.65 | 1.80 | 0.26  | 1.61 | 0.27 | 18.5                  | Deng et al., 2017 [3] |
| LKXDJ-6-5  | 4.18 99.8 | 955  | 146 | 466  | 32.6   | 130  | 50.4 | 955      | 1727 | 18.6  | 8.66  | 0.45    | 191   | 4.50 | 9.14  | 8.76 | 1.21 | 56.8  | 119  | 13.6   | 50.0 | 7.78 | 2.08 | 5.93 | 0.76 | 3.64  | 0.63 | 1.80 | 0.25  | 1.63 | 0.27 | 18.6                  | Deng et al., 2017 [3] |
| LKXDJ-7-1  | 4.91 99.8 | 962  | 129 | 293  | 25.6   | 78.8 | 62.7 | 962      | 1487 | 13.6  | 6.53  | 0.37    | 169   | 4.01 | 17.9  | 6.41 | 1.50 | 40.0  | 82.3 | 9.30   | 33.9 | 5.14 | 1.51 | 4.09 | 0.54 | 2.69  | 0.48 | 1.33 | 0.19  | 1.24 | 0.22 | 13.6                  | Deng et al., 2017 [3] |
| LKXDJ-7-2  | 4.91 99.8 | 943  | 128 | 287  | 25.2   | 78.2 | 60.3 | 943      | 1366 | 14.5  | 6.60  | 0.38    | 168   | 4.04 | 13.7  | 6.39 | 1.51 | 42.3  | 86.9 | 9.82   | 35.5 | 5.58 | 1.55 | 4.34 | 0.57 | 2.78  | 0.52 | 1.44 | 0.20  | 1.32 | 0.22 | 14.5                  | Deng et al., 2017 [3] |
| LKXDJ-7-3  | 3.30 99.8 | 945  | 124 | 269  | 25.3   | 79.4 | 61.4 | 945      | 1386 | 14.7  | 6.95  | 0.41    | 172   | 4.12 | 13.9  | 6.84 | 1.62 | 40.4  | 90.1 | 9.94   | 36.6 | 5.51 | 1.56 | 4.29 | 0.58 | 2.86  | 0.51 | 1.45 | 0.20  | 1.37 | 0.23 | 14.7                  | Deng et al., 2017 [3] |
| LKXDJ-9-1  | 6.18 99.8 | 743  | 127 | 295  | 27.0   | 81.0 | 52.9 | 743      | 1726 | 13.1  | 6.44  | 0.39    | 150   | 3.65 | 25.4  | 7.17 | 1.78 | 34.5  | 74.4 | 8.72   | 32.6 | 5.13 | 1.46 | 4.00 | 0.53 | 2.55  | 0.45 | 1.28 | 0.18  | 1.17 | 0.19 | 13.1                  | Deng et al., 2017 [3] |
| LKXDJ-9-2  | 6.71 99.8 | 754  | 139 | 325  | 27.6   | 88.9 | 52.4 | 754      | 1782 | 13.0  | 6.43  | 0.38    | 152   | 3.72 | 23.6  | 7.15 | 1.62 | 35.3  | 76.2 | 8.97   | 33.3 | 5.19 | 1.47 | 4.09 | 0.53 | 2.62  | 0.47 | 1.33 | 0.18  | 1.18 | 0.19 | 13.0                  | Deng et al., 2017 [3] |
| LKXDJ-9-3  | 7.15 99.8 | 800  | 129 | 331  | 25.8   | 81.2 | 57.3 | 800      | 1751 | 13.5  | 5.79  | 0.33    | 158   | 3.70 | 31.1  | 6.55 | 1.48 | 36.3  | 78.2 | 9.17   | 34.3 | 5.44 | 1.53 | 4.26 | 0.56 | 2.75  | 0.47 | 1.34 | 0.18  | 1.21 | 0.20 | 13.5                  | Deng et al., 2017 [3] |
| LKXDJ-10-1 | 7.68 99.8 | 1372 | 187 | 494  | 40.6   | 174  | 65.1 | 13722648 | 23.9 | 10.8  | 0.54  | 222     | 5.09  | 39.4 | 16.6  | 2.93 | 102  | 223   | 25.3 | 93.9   | 13.9 | 3.53 | 10.1 | 1.18 | 5.03 | 0.84  | 2.29 | 0.30 | 1.93  | 0.32 | 23.9 | Deng et al., 2017 [3] |                       |
| LKXDJ-10-2 | 7.56 99.8 | 1228 | 182 | 470  | 39.2   | 176  | 79.4 | 12282481 | 23.9 | 10.0  | 0.49  | 218     | 5.05  | 34.3 | 15.6  | 2.79 | 101  | 220   | 24.8 | 92.7   | 13.9 | 3.46 | 9.96 | 1.17 | 5.13 | 0.83  | 2.27 | 0.30 | 1.95  | 0.32 | 23.9 | Deng et al., 2017 [3] |                       |
| ZYLL-5-1   | 8.94 99.8 | 813  | 173 | 477  | 34.4   | 161  | 64.7 | 813      | 1248 | 17.4  | 5.79  | 0.31    | 148   | 3.50 | 97.7  | 6.88 | 1.40 | 54.7  | 116  | 13.5   | 50.2 | 7.78 | 2.12 | 5.87 | 0.74 | 3.55  | 0.64 | 1.76 | 0.24  | 1.60 | 0.27 | 17.4                  | Deng et al., 2017 [3] |
| ZYLL-5-2   | 8.09 99.8 | 856  | 169 | 480  | 35.9   | 156  | 87.1 | 856      | 1335 | 16.8  | 5.56  | 0.30    | 150   | 3.44 | 58.5  | 7.24 | 1.33 | 52.1  | 111  | 12.9   | 48.3 | 7.42 | 2.08 | 5.71 | 0.73 | 3.46  | 0.60 | 1.64 | 0.24  | 1.54 | 0.25 | 16.8                  | Deng et al., 2017 [3] |
| ZYLL-5-3   | 8.31 99.8 | 813  | 172 | 457  | 34.3   | 157  | 79.0 | 813      | 1292 | 16.9  | 6.02  | 0.32    | 152   | 3.56 | 88.0  | 7.15 | 1.42 | 55.1  | 115  | 13.1   | 48.5 | 7.54 | 2.09 | 5.76 | 0.74 | 3.44  | 0.60 | 1.71 | 0.24  | 1.56 | 0.26 | 16.9                  | Deng et al., 2017 [3] |
| ZYJL-1-1   | 9.74 99.8 | 712  | 168 | 499  | 38.4   | 220  | 77.8 | 712      | 1781 | 18.8  | 7.72  | 0.42    | 169   | 4.04 | 14.3  | 6.95 | 1.13 | 48.8  | 110  | 13.0   | 49.2 | 7.82 | 2.17 | 6.08 | 0.80 | 3.77  | 0.67 | 1.83 | 0.26  | 1.59 | 0.27 | 18.8                  | Deng et al., 2017 [3] |
| ZYJL-1-2   | 8.87 99.8 | 772  | 170 | 526  | 39.7   | 232  | 73.8 | 772      | 1695 | 16.0  | 7.25  | 0.40    | 168   | 3.94 | 8.62  | 6.63 | 1.07 | 39.8  | 89.0 | 10.7   | 40.7 | 6.51 | 1.85 | 5.07 | 0.67 | 3.24  | 0.57 | 1.54 | 0.22  | 1.37 | 0.23 | 16.0                  | Deng et al., 2017 [3] |
| LZYD-1-6   | 6.01 99.8 | 1206 | 178 | 382  | 35.2   | 112  | 68.3 | 12062781 | 27.4 | 11.8  | 0.52  | 294     | 6.55  | 8.79 | 9.30  | 1.49 | 66.9 | 154   | 18.9 | 74.4   | 13.2 | 3.74 | 10.7 | 1.36 | 6.00 | 0.96  | 2.48 | 0.31 | 1.90  | 0.31 | 27.4 | Deng et al., 2017 [3] |                       |
| LZYD-1-7   | 6.45 99.8 | 1070 | 166 | 349  | 32.2   | 106  | 65.7 | 10702859 | 26.0 | 10.9  | 0.49  | 281     | 6.33  | 9.43 | 8.45  | 1.31 | 57.6 | 138   | 16.9 | 67.3   | 12.1 | 3.40 | 9.71 | 1.26 | 5.77 | 0.91  | 2.28 | 0.29 | 1.81  | 0.29 | 26.0 | Deng et al., 2017 [3] |                       |
| LZYD-1-8   | 6.76 99.8 | 1309 | 174 | 386  | 30.1   | 116  | 72.9 | 13093355 | 25.2 | 11.3  | 0.50  | 285     | 6.27  | 7.19 | 8.49  | 1.34 | 57.0 | 141   | 17.2 | 68.8   | 12.2 | 3.45 | 9.67 | 1.25 | 5.66 | 0.88  | 2.20 | 0.28 | 1.79  | 0.28 | 25.2 | Deng et al., 2017 [3] |                       |
| LZYD-1-9   | 5.54 99.8 | 1228 | 171 | 378  | 32.0   | 115  | 84.4 | 12283300 | 26.3 | 11.3  | 0.50  | 293     | 6.78  | 7.40 | 8.60  | 1.35 | 54.8 | 135   | 16.9 | 67.6   | 12.2 | 3.46 | 9.66 | 1.30 | 5.73 | 0.91  | 2.31 | 0.30 | 1.86  | 0.28 | 26.3 | Deng et al., 2017 [3] |                       |
| LZYD-1-10  | 5.20 99.8 | 1286 | 177 | 378  | 28.7   | 118  | 92.7 | 12863389 | 24.8 | 11.0  | 0.49  | 275     | 6.41  | 7.00 | 8.50  | 1.37 | 54.7 | 132   | 16.4 | 65.3   | 11.7 | 3.39 | 9.42 | 1.22 | 5.57 | 0.90  | 2.23 | 0.29 | 1.76  | 0.29 | 24.8 | Deng et al., 2017 [3] |                       |
| LZYD-4-1   | 4.53 99.8 | 1126 | 143 | 196  | 24.6   | 75.6 | 130  | 11263652 | 18.8 | 21.5  | 1.26  | 273     | 5.54  | 13.9 | 9.91  | 1.98 | 49.6 | 124   | 14.6 | 55.8   | 8.82 | 2.32 | 6.66 | 0.84 | 3.93 | 0.68  | 1.80 | 0.25 | 1.56  | 0.25 | 18.8 | Deng et al., 2017 [3] |                       |
| LZYD-4-2   | 3.72 99.8 | 1167 | 151 | 245  | 28.3   | 92.6 | 106  | 11674040 | 19.6 | 23.2  | 1.36  | 246     | 5.66  | 11.7 | 9.33  | 1.85 | 44.9 | 116   | 14.4 | 54.9   | 8.83 | 2.39 | 6.67 | 0.86 | 4.07 | 0.69  | 1.89 | 0.25 | 1.65  | 0.28 | 19.6 | Deng et al., 2017 [3] |                       |
| PDCZ-1-1   | 2.83 99.8 | 909  | 173 | 701  | 45.4   | 353  | 108  | 909      | 3409 | 24.6  | 11.2  | 0.54    | 266   | 6.57 | 8.30  | 6.77 | 1.11 | 43.7  | 128  | 16.2   | 68.2 | 12.7 | 3.46 | 9.80 | 1.26 | 5.61  | 0.86 | 2.13 | 0.27  | 1.58 | 0.23 | 24.6                  | Deng et al., 2017 [3] |
| PDCZ-1-2   | 2.95 99.8 | 913  | 188 | 678  | 45.0   | 336  | 106  | 913      | 3271 | 24.4  | 11.4  | 0.56    | 273   | 6.61 | 5.44  | 6.86 | 1.61 | 46.4  | 131  | 16.4   | 67.8 | 12.5 | 3.50 | 9.64 | 1.26 | 5.57  | 0.85 | 2.13 | 0.27  | 1.61 | 0.24 | 24.4                  | Deng et al., 2017 [3] |
| PDCZ-2-1   | 5.01 99.9 | 849  | 203 | 638  | 45.1   | 250  | 97.9 | 849      | 2525 | 20.6  | 16.1  | 0.92    | 191   | 4.73 | 7.43  | 3.87 | 0.89 | 32.4  | 83.8 | 10.8   | 44.1 | 8.22 | 2.52 | 6.80 | 0.96 | 4.65  | 0.75 | 1.87 | 0.23  | 1.39 | 0.21 | 20.6                  | Deng et al., 2017 [3] |
| PDCZ-2-2   | 4.71 99.8 | 808  | 206 | 657  | 46.7   | 256  | 87.9 | 808      | 1841 | 20.0  | 16.3  | 0.95    | 190   | 4.66 | 7.42  | 3.89 | 0.90 | 34.6  | 84.8 | 10.7   | 43.1 | 8.10 | 2.42 | 6.65 | 0.90 | 4.47  | 0.72 | 1.77 | 0.24  | 1.31 | 0.19 | 20.0                  | Deng et al., 2017 [3] |
| LXHL-1-1   | 4.89 99.8 | 1072 | 151 | 154  | 27.1   | 50.7 | 74.4 | 10722083 | 23.9 | 20.6  | 1.17  | 238     | 5.40  | 17.5 | 8.28  | 1.94 | 53.4 | 128   | 15.6 | 59.5   | 9.60 | 2.51 | 7.53 | 0.97 | 4.76 | 0.83  | 2.35 | 0.34 | 2.09  | 0.35 | 23.9 | Deng et al., 2017 [3] |                       |
| LXHL-1-2   | 4.89 99.8 | 1114 | 148 | 150  | 25.3   | 45.6 | 73.0 | 11142205 | 23.8 | 19.2  | 1.09  | 235     | 5.49  | 14.9 | 7.39  | 1.70 | 52.9 | 128   | 15.8 | 61.7   | 9.78 | 2.61 | 7.42 | 0.98 | 4.78 | 0.82  | 2.26 | 0.32 | 2.04  | 0.33 | 23.8 | Deng et al., 2017 [3] |                       |
| LXHL-1-3   | 4.89 99.8 | 1104 | 151 | 154  | 25.8   | 49.9 | 73.6 | 11042351 | 25.1 | 19.3  | 1.11  | 231     | 5.40  | 26.1 | 7.66  | 1.70 | 51.8 | 127   | 15.6 | 60.7   | 9.90 | 2.62 | 7.61 | 1.03 | 4.99 | 0.88  | 2.44 | 0.34 | 2.20  | 0.36 | 25.1 | Deng et al., 2017 [3] |                       |
| MPYL-1-1   | 7.07 99.8 | 1231 | 165 | 497  | 34.0</ |      |      |          |      |       |       |         |       |      |       |      |      |       |      |        |      |      |      |      |      |       |      |      |       |      |      |                       |                       |

| Sample     | LOI Total | Sc    | V    | Cr    | Co      | Ni      | Rb   | Sr       | Ba       | Y    | Nb   | Ta   | Zr   | Hf    | Pb   | Th   | U     | La   | Ce      | Pr   | Nd   | Sm   | Eu   | Gd   | Tb   | Dy   | Ho   | Er   | Tm   | Yb   | Lu   | Y    | References            |                       |
|------------|-----------|-------|------|-------|---------|---------|------|----------|----------|------|------|------|------|-------|------|------|-------|------|---------|------|------|------|------|------|------|------|------|------|------|------|------|------|-----------------------|-----------------------|
| MPYL-1-2   | 7.08      | 99.8  | 1340 | 161   | 441     | 30.9    | 127  | 60.1     | 13401682 | 14.1 | 5.75 | 0.31 | 155  | 4.04  | 20.5 | 4.54 | 1.15  | 38.1 | 80.0    | 9.26 | 34.5 | 5.45 | 1.53 | 4.20 | 0.56 | 2.79 | 0.50 | 1.42 | n.a. | 1.29 | 0.21 | 14.1 | Deng et al., 2017 [3] |                       |
| MPYL-1-3   | 7.29      | 99.8  | 1264 | 160   | 442     | 32.7    | 139  | 57.3     | 12641722 | 13.5 | 5.86 | 0.34 | 152  | 3.68  | 20.8 | 4.63 | 1.19  | 35.6 | 74.9    | 8.84 | 32.7 | 5.14 | 1.47 | 4.00 | 0.54 | 2.71 | 0.48 | 1.36 | n.a. | 1.23 | 0.20 | 13.5 | Deng et al., 2017 [3] |                       |
| MPYL-2-1   | 7.67      | 99.8  | 781  | 158   | 393     | 29.1    | 112  | 50.9     | 781      | 1400 | 13.5 | 5.03 | 0.30 | 139   | 3.38 | 15.9 | 4.88  | 1.23 | 33.2    | 68.4 | 7.91 | 29.2 | 4.77 | 1.32 | 3.80 | 0.52 | 2.69 | 0.48 | 1.36 | n.a. | 1.31 | 0.22 | 13.5                  | Deng et al., 2017 [3] |
| MPYL-2-2   | 7.56      | 99.8  | 708  | 149   | 421     | 28.9    | 114  | 50.9     | 708      | 1504 | 13.5 | 4.93 | 0.29 | 135   | 3.33 | 16.4 | 4.62  | 1.16 | 32.1    | 67.5 | 7.79 | 29.4 | 4.72 | 1.34 | 3.79 | 0.52 | 2.70 | 0.48 | 1.35 | n.a. | 1.27 | 0.21 | 13.5                  | Deng et al., 2017 [3] |
| MPYL-2-3   | 7.31      | 99.9  | 831  | 152   | 352     | 28.0    | 96.3 | 60.0     | 831      | 1637 | 13.9 | 5.51 | 0.32 | 144   | 3.26 | 19.8 | 5.42  | 1.40 | 32.2    | 68.8 | 8.03 | 30.0 | 4.80 | 1.39 | 3.89 | 0.54 | 2.70 | 0.50 | 1.42 | n.a. | 1.30 | 0.22 | 13.9                  | Deng et al., 2017 [3] |
| MPWGZ-1-16 | 87        | 99.8  | 1433 | 169   | 584     | 42.3    | 249  | 52.7     | 14331347 | 17.6 | 5.51 | 0.31 | 144  | 3.51  | 15.4 | 3.82 | 0.74  | 30.4 | 64.9    | 7.81 | 30.0 | 5.10 | 1.48 | 4.29 | 0.63 | 3.32 | 0.63 | 1.72 | n.a. | 1.66 | 0.27 | 17.6 | Deng et al., 2017 [3] |                       |
| MPWGZ-1-35 | 53        | 99.8  | 1925 | 168   | 557     | 37.9    | 227  | 60.4     | 19251449 | 17.3 | 5.51 | 0.31 | 156  | 3.89  | 14.3 | 3.72 | 0.72  | 30.5 | 64.5    | 7.68 | 29.6 | 5.01 | 1.55 | 4.20 | 0.62 | 3.27 | 0.61 | 1.72 | n.a. | 1.68 | 0.27 | 17.3 | Deng et al., 2017 [3] |                       |
| MPWGZ-1-56 | 34        | 99.8  | 1446 | 171   | 557     | 40.8    | 238  | 54.8     | 14461542 | 16.9 | 5.70 | 0.32 | 146  | 3.67  | 14.2 | 3.85 | 0.79  | 29.6 | 62.5    | 7.49 | 28.2 | 4.89 | 1.45 | 4.07 | 0.60 | 3.24 | 0.60 | 1.71 | n.a. | 1.60 | 0.26 | 16.9 | Deng et al., 2017 [3] |                       |
| LYGC-2-1   | 3.99      | 99.8  | 898  | 166   | 417     | 40.0    | 215  | 54.3     | 898      | 2324 | 21.1 | 8.41 | 0.42 | 179   | 4.33 | 13.7 | 8.54  | 1.73 | 53.2    | 124  | 14.9 | 56.8 | 9.08 | 2.49 | 6.81 | 0.87 | 4.16 | 0.72 | 2.05 | n.a. | 1.88 | 0.30 | 21.1                  | Deng et al., 2017 [3] |
| LYGC-2-3   | 5.51      | 99.8  | 763  | 161   | 391     | 35.6    | 189  | 52.2     | 763      | 2644 | 19.1 | 8.30 | 0.41 | 176   | 3.93 | 17.3 | 8.13  | 1.68 | 46.8    | 120  | 13.9 | 53.5 | 8.44 | 2.24 | 6.41 | 0.82 | 3.86 | 0.67 | 1.84 | n.a. | 1.70 | 0.29 | 19.1                  | Deng et al., 2017 [3] |
| LYGC-2-4   | 5.18      | 99.8  | 820  | 171   | 397     | 36.5    | 186  | 58.3     | 820      | 2862 | 19.8 | 8.35 | 0.42 | 176   | 4.26 | 19.4 | 8.44  | 1.68 | 48.9    | 124  | 14.5 | 55.7 | 8.64 | 2.44 | 6.62 | 0.86 | 3.98 | 0.68 | 1.96 | 0.27 | 1.76 | 0.30 | 19.8                  | Deng et al., 2017 [3] |
| RSXC-2-1   | 5.84      | 99.8  | 1925 | 163   | 369     | 34.5    | 147  | 58.6     | 19251577 | 16.7 | 8.42 | 0.48 | 176  | 4.59  | 12.1 | 3.00 | 0.65  | 32.2 | 70.6    | 8.67 | 33.8 | 5.77 | 1.78 | 4.68 | 0.67 | 3.40 | 0.59 | 1.62 | 0.23 | 1.45 | 0.23 | 16.7 | Deng et al., 2017 [3] |                       |
| RSXC-2-2   | 6.00      | 99.9  | 890  | 153   | 221     | 28.5    | 96.3 | 74.3     | 890      | 1763 | 14.9 | 9.02 | 0.50 | 183   | 4.71 | 9.25 | 3.13  | 0.76 | 30.7    | 70.9 | 8.71 | 33.6 | 5.57 | 1.82 | 4.56 | 0.63 | 3.06 | 0.52 | 1.41 | 0.20 | 1.25 | 0.20 | 14.9                  | Deng et al., 2017 [3] |
| RSXC-2-5   | 5.97      | 99.8  | 943  | 161   | 370     | 32.1    | 137  | 56.4     | 943      | 1728 | 16.5 | 8.08 | 0.44 | 166   | 4.35 | 14.0 | 2.70  | 0.59 | 29.7    | 68.4 | 8.38 | 33.1 | 5.77 | 1.78 | 4.70 | 0.66 | 3.37 | 0.60 | 1.60 | 0.22 | 1.37 | 0.24 | 16.5                  | Deng et al., 2017 [3] |
| RSXC-3-1   | 6.36      | 99.8  | 806  | 154   | 353     | 32.7    | 150  | 65.3     | 806      | 2018 | 16.5 | 9.87 | 0.55 | 186   | 4.67 | 8.10 | 3.59  | 0.85 | 33.8    | 80.3 | 9.78 | 37.9 | 6.29 | 1.92 | 4.95 | 0.67 | 3.31 | 0.57 | 1.62 | 0.23 | 1.45 | 0.22 | 16.5                  | Deng et al., 2017 [3] |
| RSXC-3-2   | 6.54      | 99.8  | 809  | 153   | 375     | 31.4    | 135  | 65.0     | 809      | 2101 | 16.8 | 9.78 | 0.54 | 185   | 4.61 | 6.87 | 3.63  | 0.86 | 34.1    | 80.9 | 9.92 | 38.4 | 6.46 | 1.97 | 5.10 | 0.67 | 3.40 | 0.59 | 1.64 | 0.23 | 1.41 | 0.23 | 16.8                  | Deng et al., 2017 [3] |
| RSXC-3-4   | 5.91      | 99.8  | 1541 | 156   | 271     | 31.8    | 117  | 70.4     | 15411888 | 15.6 | 10.0 | 0.55 | 192  | 4.75  | 8.01 | 3.46 | 0.83  | 36.0 | 78.7    | 9.36 | 36.0 | 5.83 | 1.82 | 4.80 | 0.65 | 3.19 | 0.56 | 1.51 | 0.21 | 1.34 | 0.23 | 15.6 | Deng et al., 2017 [3] |                       |
| WDSC-1-1   | 6.79      | 99.8  | 1337 | 157   | 287     | 32.8    | 135  | 50.4     | 13372017 | 18.7 | 9.85 | 0.49 | 187  | 4.29  | 26.4 | 6.23 | 1.47  | 50.5 | 113     | 13.2 | 50.1 | 7.91 | 2.17 | 6.12 | 0.79 | 3.86 | 0.65 | 1.82 | 0.26 | 1.70 | 0.28 | 18.7 | Deng et al., 2017 [3] |                       |
| WDSC-1-2   | 6.18      | 99.8  | 1471 | 154   | 304     | 30.4    | 125  | 54.8     | 14711939 | 19.3 | 8.94 | 0.46 | 196  | 4.43  | 23.7 | 5.71 | 1.33  | 52.1 | 115     | 13.6 | 51.1 | 8.11 | 2.32 | 6.24 | 0.82 | 3.87 | 0.67 | 1.87 | 0.26 | 1.72 | 0.29 | 19.3 | Deng et al., 2017 [3] |                       |
| WDSC-1-5   | 5.93      | 99.8  | 1299 | 152   | 315     | 33.1    | 141  | 55.0     | 12991786 | 18.9 | 9.44 | 0.49 | 192  | 4.49  | 36.3 | 6.02 | 1.37  | 49.5 | 109     | 12.8 | 48.3 | 7.83 | 2.30 | 5.90 | 0.78 | 3.79 | 0.66 | 1.85 | 0.26 | 1.70 | 0.28 | 18.9 | Deng et al., 2017 [3] |                       |
| WDSC-2-1   | 5.29      | 99.8  | 998  | 154   | 241     | 31.0    | 123  | 79.3     | 998      | 2736 | 19.7 | 10.8 | 0.57 | 189   | 4.05 | 24.3 | 7.98  | 1.88 | 42.4    | 114  | 13.0 | 49.9 | 7.95 | 2.22 | 6.02 | 0.79 | 3.77 | 0.66 | 1.84 | 0.26 | 1.67 | 0.28 | 19.7                  | Deng et al., 2017 [3] |
| WDSC-2-2   | 0.59      | 99.8  | 1003 | 150   | 280     | 30.9    | 124  | 89.1     | 1003     | n.a. | 20.7 | 10.5 | 0.54 | 192   | 4.33 | 22.9 | 8.16  | 1.82 | 44.8    | 110  | 13.5 | 52.0 | 8.44 | 2.33 | 6.24 | 0.82 | 3.98 | 0.71 | 1.98 | 0.29 | 1.89 | 0.32 | 20.7                  | Deng et al., 2017 [3] |
| WDSC-2-3   | 0.56      | 99.8  | 977  | 145   | 269     | 31.5    | 128  | 94.2     | 977      | n.a. | 20.9 | 10.7 | 0.56 | 191   | 4.32 | 37.2 | 8.19  | 1.89 | 36.7    | 119  | 12.5 | 50.3 | 8.37 | 2.29 | 6.27 | 0.83 | 4.08 | 0.72 | 2.02 | 0.29 | 1.94 | 0.33 | 20.9                  | Deng et al., 2017 [3] |
| WDSC-3-1   | 0.44      | 99.8  | 4054 | 161   | 280     | 30.0    | 66.1 | 55.0     | 4054     | n.a. | 18.4 | 8.99 | 0.48 | 228   | 5.02 | 20.4 | 8.96  | 2.61 | 48.5    | 103  | 12.4 | 48.8 | 8.69 | 2.44 | 6.58 | 0.84 | 3.92 | 0.63 | 1.72 | 0.23 | 1.53 | 0.26 | 18.4                  | Deng et al., 2017 [3] |
| WDSC-3-3   | 0.44      | 99.8  | 5114 | 160   | 274     | 29.4    | 63.7 | 64.9     | 5114     | n.a. | 17.4 | 8.93 | 0.47 | 240   | 5.71 | 35.5 | 8.69  | 2.44 | 44.6    | 97.1 | 11.7 | 46.6 | 8.26 | 2.31 | 6.26 | 0.79 | 3.72 | 0.59 | 1.65 | 0.22 | 1.39 | 0.24 | 17.4                  | Deng et al., 2017 [3] |
| WDSC-3-4   | 0.44      | 99.8  | 2184 | 157   | 261     | 28.8    | 60.5 | 53.3     | 2184     | n.a. | 18.7 | 8.79 | 0.48 | 212   | 4.98 | 25.6 | 8.90  | 2.43 | 46.9    | 103  | 12.4 | 49.0 | 8.71 | 2.43 | 6.74 | 0.85 | 3.94 | 0.64 | 1.74 | 0.24 | 1.53 | 0.26 | 18.7                  | Deng et al., 2017 [3] |
| LYGC-1-1   | 6.04      | 99.8  | 727  | 144   | 295     | 28.9    | 110  | 44.1     | 727      | 1814 | 17.9 | 9.31 | 0.49 | 167   | 3.95 | 23.5 | 7.74  | 1.54 | 56.0    | 124  | 14.1 | 51.7 | 7.84 | 2.16 | 6.01 | 0.75 | 3.51 | 0.61 | 1.74 | n.a. | 1.54 | 0.26 | 17.9                  | Deng et al., 2017 [3] |
| LYGC-1-2   | 4.97      | 99.8  | 1177 | 154   | 301     | 28.6    | 112  | 55.2     | 11772113 | 18.1 | 9.51 | 0.50 | 182  | 4.22  | 11.7 | 7.89 | 1.59  | 56.7 | 124     | 14.2 | 52.3 | 8.12 | 2.15 | 5.98 | 0.75 | 3.59 | 0.64 | 1.77 | n.a. | 1.65 | 0.28 | 18.1 | Deng et al., 2017 [3] |                       |
| LYGC-1-5   | 5.55      | 99.8  | 884  | 151   | 302     | 29.0    | 115  | 57.9     | 884      | 1775 | 18.2 | 9.48 | 0.51 | 189   | 4.54 | 9.23 | 7.87  | 1.57 | 57.9    | 131  | 14.9 | 55.0 | 8.28 | 2.31 | 6.19 | 0.78 | 3.67 | 0.64 | 1.77 | n.a. | 1.59 | 0.26 | 18.2                  | Deng et al., 2017 [3] |
| RSXC-1-1   | 6.59      | 99.8  | 1176 | 161   | 22.8    | 27.6    | 12.4 | 63.8     | 11762537 | 20.8 | 9.41 | 0.49 | 208  | 4.42  | 21.7 | 5.68 | 1.15  | 55.1 | 128     | 15.5 | 59.3 | 9.44 | 2.65 | 7.06 | 0.91 | 4.33 | 0.74 | 2.04 | 0.27 | 1.81 | 0.29 | 20.8 | Deng et al., 2017 [3] |                       |
| RSXC-1-2   | 4.33      | 99.8  | 1415 | 166   | 16.0    | 28.2    | 12.0 | 49.4     | 14152591 | 22.8 | 9.57 | 0.48 | 207  | 4.51  | 14.2 | 5.88 | 1.19  | 55.3 | 127     | 15.4 | 58.3 | 9.23 | 2.66 | 7.05 | 0.92 | 4.51 | 0.79 | 2.24 | 0.32 | 2.03 | 0.34 | 22.8 | Deng et al., 2017 [3] |                       |
| RSXC-1-4   | 6.49      | 99.8  | 1286 | 174   | 23.8    | 30.7    | 13.6 | 57.3     | 12862411 | 17.9 | 8.72 | 0.45 | 187  | 4.11  | 13.7 | 5.44 | 1.05  | 50.5 | 116     | 14.1 | 53.8 | 8.44 | 2.48 | 6.43 | 0.81 | 3.72 | 0.63 | 1.67 | 0.22 | 1.45 | 0.23 | 17.9 | Deng et al., 2017 [3] |                       |
| ZYLL-2-1   | 7.83      | 99.8  | 696  | 156   | 530     | 36.7    | 167  | 31.1     | 696      | 1394 | 14.4 | 7.13 | 0.36 | 135   | 3.18 | 14.8 | 6.18  | 1.27 | 35.5    | 73.4 | 8.48 | 31.3 | 5.04 | 1.46 | 4.12 | 0.55 | 2.85 | 0.51 | 1.43 | 0.20 | 1.32 | 0.22 | 14.4                  | Deng et al., 2017 [3] |
| ZYLL-2-2   | 8.26      | 99.8  | 713  | 156   | 513     | 34.3    | 151  | 31.5     | 713      | 1341 | 13.9 | 6.71 | 0.35 | 139   | 3.45 | 22.5 | 5.61  | 1.26 | 35.8    | 74.0 | 8.62 | 31.6 | 5.01 | 1.48 | 4.04 | 0.56 | 2.73 | 0.48 | 1.35 | 0.19 | 1.26 | 0.21 | 13.9                  | Deng et al., 2017 [3] |
| ZYLL-2-3   | 8.17      | 99.8  | 681  | 159   | 533     | 34.1    | 154  | 28.9     | 681      | 1302 | 14.3 | 6.66 | 0.34 | 132   | 3.27 | 17.3 | 5.36  | 1.29 | 37.2    | 75.5 | 8.77 | 32.0 | 5.11 | 1.50 | 4.14 | 0.57 | 2.88 | 0.51 | 1.40 | 0.19 | 1.30 | 0.21 | 14.3                  | Deng et al., 2017 [3] |
| ZYLL-7-1   | 5.14      | 99.8  | 1024 | 173   | 548     | 39.5    | 223  | 72.9     | 10241781 | 17.6 | 7.12 | 0.39 | 173  | 4.10  | 18.2 | 8.43 | 1.60  | 53.6 | 116     | 13.7 | 51.0 | 8.11 | 2.09 | 6.08 | 0.76 | 3.62 | 0.63 | 1.73 | 0.24 | 1.50 | 0.26 | 17.6 | Deng et al., 2017 [3] |                       |
| ZYLL-7-2   | 5.44      | 99.8  | 1038 | 178   | 568     | 38.9    | 222  | 66.7     | 10381648 | 17.4 | 7.02 | 0.37 | 172  | 4.12  | 23.2 | 8.56 | 1.61  | 53.1 | 115     | 13.4 | 49.8 | 7.83 | 2.14 | 5.76 | 0.74 | 3.45 | 0.62 | 1.73 | 0.24 | 1.50 | 0.26 | 17.4 | Deng et al., 2017 [3] |                       |
| ZYLL-7-3   | 5.38      | 99.76 | 1045 | 183.5 | 557.938 | 04210.1 | 74.2 | 10451789 | 18.45    | 7.12 | 0.36 | 174  | 4.11 | 18.54 | 8.48 | 1.62 | 56.93 | 123  | 14.2952 | 97   | 8.36 | 2.16 | 6.28 | 0.79 | 3.78 | 0.65 | 1.82 | 0.25 | 1.63 | 0.27 |      |      |                       |                       |

**Table S2.** Compilation of PGE, Cu, Ni, and S concentrations in ore and ore-related rocks from porphyry Cu–Au deposits and lode gold provinces worldwide.

| Sample no.                                                                  | Specific locality          | Lithology        | Sample type | Ir (ng/g) | Ru (ng/g) | Rh (ng/g) | Pt (ng/g) | Pd (ng/g) | Au (ng/g) | ΣPGE (ng/g) | Ru/Ir  | Ru/Pt | Pd/Ir  | Pd/Pt | Reference                 |
|-----------------------------------------------------------------------------|----------------------------|------------------|-------------|-----------|-----------|-----------|-----------|-----------|-----------|-------------|--------|-------|--------|-------|---------------------------|
| <b>Ore of orogenic gold deposit (8)</b>                                     |                            |                  |             |           |           |           |           |           |           |             |        |       |        |       |                           |
| 1/2/4000                                                                    | Danba gold deposit         | pyrrhotite       | whole rock  | 0.061     | 0.281     | 0.282     | 0.148     | 1.124     | n.a.      | 1.895       | 4.6    | 1.9   | 18.6   | 7.6   | Wang et al., 2020 [4]     |
| 3970-16-1                                                                   | Danba gold deposit         | pyrrhotite       | whole rock  | 0.022     | 0.338     | 0.192     | 0.182     | 0.95      | n.a.      | 1.684       | 15.7   | 1.8   | 44.2   | 5.2   | Wang et al., 2020 [4]     |
| 12/3/4155                                                                   | Danba gold deposit         | pyrrhotite       | whole rock  | 0.112     | 0.41      | 0.165     | 0.1       | 0.718     | n.a.      | 1.505       | 3.7    | 4.1   | 6.4    | 7.2   | Wang et al., 2020 [4]     |
| 6/1/4035                                                                    | Danba gold deposit         | pyrrhotite       | whole rock  | 0.035     | 0.287     | 0.348     | 0.073     | 0.868     | n.a.      | 1.61        | 8.2    | 4     | 24.9   | 12    | Wang et al., 2020 [4]     |
| 3880-15-4                                                                   | Danba gold deposit         | pyrrhotite       | whole rock  | 0.044     | 0.446     | 0.286     | 0.127     | 0.34      | n.a.      | 1.243       | 10.2   | 3.5   | 7.8    | 2.7   | Wang et al., 2020 [4]     |
| 4/1/4035                                                                    | Danba gold deposit         | pyrrhotite       | whole rock  | 0.03      | 0.329     | 0.32      | 0.041     | 0.475     | n.a.      | 1.196       | 10.8   | 7.9   | 15.6   | 11.5  | Wang et al., 2020 [4]     |
| 12/2/4035                                                                   | Danba gold deposit         | pyrrhotite       | whole rock  | 0.071     | 0.309     | 0.156     | 0.041     | 0.578     | n.a.      | 1.155       | 4.4    | 7.5   | 8.2    | 14.1  | Wang et al., 2020 [4]     |
| 3780-15-2                                                                   | Danba gold deposit         | pyrrhotite       | whole rock  | 0.037     | 0.212     | 0.268     | 0.181     | 0.257     | n.a.      | 0.955       | 5.7    | 1.2   | 6.9    | 1.4   | Wang et al., 2020 [4]     |
| GC92-1500                                                                   | Galore Creek Cu–Au deposit | heavy mineral    | whole rock  | 0.1       | 5         | 0.1       | 17        | 407       | n.a.      | 429.2       | 50.00  | 0.29  | 4070   | 23.94 | Thompson et al., 2001 [5] |
| GC92-1523                                                                   | Galore Creek Cu–Au deposit | heavy mineral    | whole rock  | 0.1       | 9         | 0.5       | 54        | 1039      | n.a.      | 1102.6      | 90.00  | 0.17  | 10390  | 19.24 | Thompson et al., 2001 [5] |
| GC92-1541                                                                   | Galore Creek Cu–Au deposit | heavy mineral    | whole rock  | 0.1       | 0.1       | 0.1       | 15        | 103       | n.a.      | 118.3       | 1.00   | 0.01  | 1030   | 6.87  | Thompson et al., 2001 [5] |
| GC92-1541                                                                   | Galore Creek Cu–Au deposit | heavy mineral    | whole rock  | 0.2       | 5         | 0.5       | 107       | 1581      | n.a.      | 1693.7      | 25.00  | 0.05  | 7905   | 14.78 | Thompson et al., 2001 [5] |
| MBX                                                                         | Mt. Milligan Cu–Au deposit | heavy mineral    | whole rock  | 0.2       | 0.1       | 0.7       | 28        | 112       | n.a.      | 141.0       | 0.50   | 0.00  | 560    | 4.00  | Thompson et al., 2001 [5] |
| 66Z                                                                         | Mt. Milligan Cu–Au deposit | heavy mineral    | whole rock  | 0.1       | 8         | 0.3       | 17        | 51        | n.a.      | 76.4        | 80.00  | 0.47  | 510    | 3.00  | Thompson et al., 2001 [5] |
| WBX                                                                         | Mt. Milligan Cu–Au deposit | heavy mineral    | whole rock  | 1.3       | 32        | 2.2       | 23        | 124       | n.a.      | 182.5       | 24.62  | 1.39  | 95.38  | 5.39  | Thompson et al., 2001 [5] |
| SST                                                                         | Mt. Milligan Cu–Au deposit | heavy mineral    | whole rock  | 0.3       | 33        | 0.9       | 62        | 588       | n.a.      | 684.2       | 110.00 | 0.53  | 1960   | 9.48  | Thompson et al., 2001 [5] |
| MMSS-1                                                                      | Mt. Milligan Cu–Au deposit | heavy mineral    | whole rock  | 0.6       | 7         | 2.1       | 111       | 6312      | n.a.      | 6432.7      | 11.67  | 0.06  | 10520  | 56.86 | Thompson et al., 2001 [5] |
| <b>Felsic intrusions associated with porphyry Cu–Au mineralization (72)</b> |                            |                  |             |           |           |           |           |           |           |             |        |       |        |       |                           |
| TWG901                                                                      | Tuwu Cu–Au deposit         | diorite porphyry | whole rock  | 0.012     | 0.023     | 0.018     | 1.22      | 1.01      | 1         | 2.28        | 1.92   | 0.02  | 84.17  | 0.83  | Gao et al., 2015 [6]      |
| TWG902                                                                      | Tuwu Cu–Au deposit         | diorite porphyry | whole rock  | 0.011     | 0.021     | 0.022     | 0.44      | 0.44      | 16        | 0.93        | 1.91   | 0.05  | 40.00  | 1.00  | Gao et al., 2015 [6]      |
| TWG903                                                                      | Tuwu Cu–Au deposit         | diorite porphyry | whole rock  | 0.01      | 0.036     | 0.067     | 0.51      | 0.77      | 1         | 1.39        | 3.60   | 0.07  | 77.00  | 1.51  | Gao et al., 2015 [6]      |
| TWG904                                                                      | Tuwu Cu–Au deposit         | diorite porphyry | whole rock  | 0.009     | 0.023     | 0.023     | 0.55      | 0.75      | 22        | 1.36        | 2.56   | 0.04  | 83.33  | 1.36  | Gao et al., 2015 [6]      |
| TWG905                                                                      | Tuwu Cu–Au deposit         | diorite porphyry | whole rock  | 0.008     | 0.027     | 0.041     | 0.33      | 0.96      | 6         | 1.37        | 3.38   | 0.08  | 120.00 | 2.91  | Gao et al., 2015 [6]      |
| TWG907                                                                      | Tuwu Cu–Au deposit         | diorite porphyry | whole rock  | 0.011     | 0.02      | 0.027     | 0.58      | 0.65      | 13        | 1.29        | 1.82   | 0.03  | 59.09  | 1.12  | Gao et al., 2015 [6]      |
| TWG908                                                                      | Tuwu Cu–Au deposit         | diorite porphyry | whole rock  | 0.011     | 0.034     | 0.049     | 0.49      | 0.74      | 3         | 1.32        | 3.09   | 0.07  | 67.27  | 1.51  | Gao et al., 2015 [6]      |
| TWG909                                                                      | Tuwu Cu–Au deposit         | diorite porphyry | whole rock  | 0.012     | 0.026     | 0.016     | 0.44      | 0.85      | 3         | 1.34        | 2.17   | 0.06  | 70.83  | 1.93  | Gao et al., 2015 [6]      |
| TWG910                                                                      | Tuwu Cu–Au deposit         | diorite porphyry | whole rock  | 0.01      | 0.024     | 0.017     | 0.56      | 1         | 6         | 1.61        | 2.40   | 0.04  | 100.00 | 1.79  | Gao et al., 2015 [6]      |
| TWG911                                                                      | Tuwu Cu–Au deposit         | diorite porphyry | whole rock  | 0.014     | 0.014     | 0.054     | 0.76      | 0.9       | 8         | 1.74        | 1.00   | 0.02  | 64.29  | 1.18  | Gao et al., 2015 [6]      |
| TWG912                                                                      | Tuwu Cu–Au deposit         | diorite porphyry | whole rock  | 0.011     | 0.029     | 0.033     | 0.82      | 1.07      | 15        | 1.96        | 2.64   | 0.04  | 97.27  | 1.30  | Gao et al., 2015 [6]      |
| TWG913                                                                      | Tuwu Cu–Au deposit         | diorite porphyry | whole rock  | 0.014     | 0.026     | 0.033     | 0.97      | 0.81      | 13        | 1.85        | 1.86   | 0.03  | 57.86  | 0.84  | Gao et al., 2015 [6]      |
| TWG914                                                                      | Tuwu Cu–Au deposit         | diorite porphyry | whole rock  | 0.01      | 0.033     | 0.012     | 0.59      | 0.75      | 2         | 1.40        | 3.30   | 0.06  | 75.00  | 1.27  | Gao et al., 2015 [6]      |
| TWG915                                                                      | Tuwu Cu–Au deposit         | diorite porphyry | whole rock  | 0.008     | 0.031     | 0.01      | 0.53      | 0.79      | 2         | 1.37        | 3.88   | 0.06  | 98.75  | 1.49  | Gao et al., 2015 [6]      |
| TWG916                                                                      | Tuwu Cu–Au deposit         | diorite porphyry | whole rock  | 0.008     | 0.023     | 0.029     | 0.91      | 1.11      | 7         | 2.08        | 2.88   | 0.03  | 138.75 | 1.22  | Gao et al., 2015 [6]      |
| XTWG15                                                                      | Tuwu Cu–Au deposit         | diorite porphyry | whole rock  | 0.022     | 0.026     | 0.045     | 0.045     | 1.24      | 83        | 1.38        | 1.18   | 0.58  | 56.36  | 27.56 | Gao et al., 2015 [6]      |
| XTWG15                                                                      | Tuwu Cu–Au deposit         | diorite porphyry | whole rock  | 0.023     | 0.053     | 0.053     | 0.46      | 0.46      | 57        | 1.05        | 2.30   | 0.12  | 20.00  | 1.00  | Gao et al., 2015 [6]      |
| XTWG22                                                                      | Tuwu Cu–Au deposit         | diorite porphyry | whole rock  | 0.022     | 0.034     | 0.058     | 0.45      | 1.14      | 72        | 1.70        | 1.55   | 0.08  | 51.82  | 2.53  | Gao et al., 2015 [6]      |
| XTWG24                                                                      | Tuwu Cu–Au deposit         | diorite porphyry | whole rock  | 0.058     | 0.03      | 0.167     | 0.71      | 1.01      | 310       | 1.98        | 0.52   | 0.04  | 17.41  | 1.42  | Gao et al., 2015 [6]      |
| XTWG27                                                                      | Tuwu Cu–Au deposit         | diorite porphyry | whole rock  | 0.022     | 0.018     | 0.067     | 0.33      | 1.07      | 200       | 1.51        | 0.82   | 0.05  | 48.64  | 3.24  | Gao et al., 2015 [6]      |
| XTWG30                                                                      | Tuwu Cu–Au deposit         | diorite porphyry | whole rock  | 0.017     | 0.026     | 0.05      | 0.42      | 0.71      | 226       | 1.22        | 1.53   | 0.06  | 41.76  | 1.69  | Gao et al., 2015 [6]      |
| XTWG34                                                                      | Tuwu Cu–Au deposit         | diorite porphyry | whole rock  | 0.025     | 0.039     | 0.016     | 0.38      | 0.67      | 87        | 1.13        | 1.56   | 0.10  | 26.80  | 1.76  | Gao et al., 2015 [6]      |
| XTWG36                                                                      | Tuwu Cu–Au deposit         | diorite porphyry | whole rock  | 0.032     | 0.03      | 0.051     | 0.53      | 1.17      | 162       | 1.81        | 0.94   | 0.06  | 36.56  | 2.21  | Gao et al., 2015 [6]      |

|                                                           |                       |                        |            |       |       |       |       |       |      |       |      |      |         |       |                               |
|-----------------------------------------------------------|-----------------------|------------------------|------------|-------|-------|-------|-------|-------|------|-------|------|------|---------|-------|-------------------------------|
| XTWG43                                                    | Tuwu Cu–Au deposit    | diorite porphyry       | whole rock | 0.011 | 0.026 | 0.038 | 0.49  | 1.17  | 162  | 1.74  | 2.36 | 0.05 | 106.36  | 2.39  | Gao et al., 2015 [6]          |
| XTWG44                                                    | Tuwu Cu–Au deposit    | diorite porphyry       | whole rock | 0.009 | 0.075 | 0.029 | 0.39  | 1.08  | 290  | 1.58  | 8.33 | 0.19 | 120.00  | 2.77  | Gao et al., 2015 [6]          |
| XTWG45                                                    | Tuwu Cu–Au deposit    | diorite porphyry       | whole rock | 0.012 | 0.04  | 0.029 | 0.73  | 1.11  | 323  | 1.92  | 3.33 | 0.05 | 92.50   | 1.52  | Gao et al., 2015 [6]          |
| XTWG50                                                    | Tuwu Cu–Au deposit    | diorite porphyry       | whole rock | 0.011 | 0.027 | 0.035 | 0.29  | 0.67  | 321  | 1.03  | 2.45 | 0.09 | 60.91   | 2.31  | Gao et al., 2015 [6]          |
| XTWG66                                                    | Tuwu Cu–Au deposit    | diorite porphyry       | whole rock | 0.013 | 0.028 | 0.077 | 0.28  | 1.19  | 18   | 1.59  | 2.15 | 0.10 | 91.54   | 4.25  | Gao et al., 2015 [6]          |
| XTWG68                                                    | Tuwu Cu–Au deposit    | diorite porphyry       | whole rock | 0.011 | 0.023 | 0.013 | 0.2   | 0.5   | 16   | 0.75  | 2.09 | 0.12 | 45.45   | 2.50  | Gao et al., 2015 [6]          |
| XTWG18                                                    | Tuwu Cu–Au deposit    | diorite porphyry       | whole rock | 0.02  | 0.067 | 0.093 | 0.22  | 21.5  | 10   | 21.90 | 3.35 | 0.30 | 1075.00 | 97.73 | Gao et al., 2015 [6]          |
| XTWG84                                                    | Tuwu Cu–Au deposit    | diorite porphyry       | whole rock | 0.046 | 0.08  | 0.037 | 0.63  | 0.65  | 68   | 1.44  | 1.74 | 0.13 | 14.13   | 1.03  | Gao et al., 2015 [6]          |
| XTWG88                                                    | Tuwu Cu–Au deposit    | diorite porphyry       | whole rock | 0.019 | 0.051 | 0.027 | 0.88  | 1.16  | 31   | 2.14  | 2.68 | 0.06 | 61.05   | 1.32  | Gao et al., 2015 [6]          |
| XTWG92                                                    | Tuwu Cu–Au deposit    | diorite porphyry       | whole rock | 0.031 | 0.067 | 0.021 | 0.57  | 0.76  | 44   | 1.45  | 2.16 | 0.12 | 24.52   | 1.33  | Gao et al., 2015 [6]          |
| XTWG94                                                    | Tuwu Cu–Au deposit    | diorite porphyry       | whole rock | 0.04  | 0.061 | 0.029 | 1.12  | 1.26  | 29   | 2.51  | 1.53 | 0.05 | 31.50   | 1.13  | Gao et al., 2015 [6]          |
| XTWG19                                                    | Tuwu Cu–Au deposit    | plagiogranite porphyry | whole rock | 0.02  | 0.109 | 0.023 | 0.49  | 1.38  | 73   | 2.02  | 5.45 | 0.22 | 69.00   | 2.82  | Gao et al., 2015 [6]          |
| XTWG40                                                    | Tuwu Cu–Au deposit    | plagiogranite porphyry | whole rock | 0.012 | 0.023 | 0.069 | 0.006 | 0.51  | 136  | 0.62  | 1.92 | 3.83 | 42.50   | 85.00 | Gao et al., 2015 [6]          |
| XTWG53                                                    | Tuwu Cu–Au deposit    | plagiogranite porphyry | whole rock | 0.007 | 0.054 | 0.024 | 1.49  | 2.35  | 1590 | 3.93  | 7.71 | 0.04 | 335.71  | 1.58  | Gao et al., 2015 [6]          |
| XTWG55                                                    | Tuwu Cu–Au deposit    | plagiogranite porphyry | whole rock | 0.009 | 0.057 | 0.016 | 0.3   | 1.2   | 120  | 1.58  | 6.33 | 0.19 | 133.33  | 4.00  | Gao et al., 2015 [6]          |
| <b>Mafic dikes associated with Au mineralization (72)</b> |                       |                        |            |       |       |       |       |       |      |       |      |      |         |       |                               |
| YLW-1                                                     | Zhenyuan gold deposit | lamprophyres           | whole rock | 0.062 | 0.056 | 0.13  | 2.24  | 1.91  | n.a. | 4.40  | 0.90 | 0.03 | 30.81   | 0.85  | Gan and Hang et al., 2017 [7] |
| YLW-2                                                     | Zhenyuan gold deposit | lamprophyres           | whole rock | 0.063 | 0.031 | 0.11  | 1.53  | 1.57  | n.a. | 3.30  | 0.49 | 0.02 | 24.92   | 1.03  | Gan and Hang et al., 2017 [7] |
| YLW-3                                                     | Zhenyuan gold deposit | lamprophyres           | whole rock | 0.055 | 0.05  | 0.02  | 0.29  | 0.32  | n.a. | 0.74  | 0.91 | 0.17 | 5.82    | 1.10  | Gan and Hang et al., 2017 [7] |
| YLW-3                                                     | Zhenyuan gold deposit | lamprophyres           | whole rock | 0.080 | 0.092 | 0.018 | 0.294 | 0.378 | n.a. | 0.86  | 1.15 | 0.31 | 4.74    | 1.29  | Gan and Hang et al., 2017 [7] |
| YLW-8                                                     | Zhenyuan gold deposit | lamprophyres           | whole rock | 0.051 | 0.02  | 0.12  | 2.82  | 2.99  | n.a. | 6.00  | 0.39 | 0.01 | 58.63   | 1.06  | Gan and Hang et al., 2017 [7] |
| YLW-9                                                     | Zhenyuan gold deposit | lamprophyres           | whole rock | 0.11  | 0.054 | 0.18  | 1.62  | 1.76  | n.a. | 3.72  | 0.49 | 0.03 | 16.00   | 1.09  | Gan and Hang et al., 2017 [7] |
| YLW-10                                                    | Zhenyuan gold deposit | lamprophyres           | whole rock | 0.049 | 0.087 | 0.017 | 1.18  | 0.51  | n.a. | 1.84  | 1.78 | 0.07 | 10.41   | 0.43  | Gan and Hang et al., 2017 [7] |
| YLW-11                                                    | Zhenyuan gold deposit | lamprophyres           | whole rock | 0.096 | 0.18  | 0.041 | 0.64  | 0.67  | n.a. | 1.63  | 1.88 | 0.28 | 6.98    | 1.05  | Gan and Hang et al., 2017 [7] |
| YLW-12                                                    | Zhenyuan gold deposit | lamprophyres           | whole rock | 0.067 | 0.027 | 0.087 | 1.73  | 3.06  | n.a. | 4.97  | 0.40 | 0.02 | 45.67   | 1.77  | Gan and Hang et al., 2017 [7] |
| YLW-13                                                    | Zhenyuan gold deposit | lamprophyres           | whole rock | 0.033 | 0.004 | 0.054 | 3.1   | 2.77  | n.a. | 5.96  | 0.12 | 0.00 | 83.94   | 0.89  | Gan and Hang et al., 2017 [7] |
| YD-1                                                      | Zhenyuan gold deposit | lamprophyres           | whole rock | 0.12  | 0.048 | 0.12  | 2.75  | 1.96  | n.a. | 5.00  | 0.40 | 0.02 | 16.33   | 0.71  | Gan and Hang et al., 2017 [7] |
| YD-2                                                      | Zhenyuan gold deposit | lamprophyres           | whole rock | 0.16  | 0.036 | 0.098 | 2.39  | 2.07  | n.a. | 4.75  | 0.23 | 0.02 | 12.94   | 0.87  | Gan and Hang et al., 2017 [7] |
| YD-3                                                      | Zhenyuan gold deposit | lamprophyres           | whole rock | 0.077 | 0.006 | 0.14  | 2.48  | 2.79  | n.a. | 5.49  | 0.08 | 0.00 | 36.23   | 1.13  | Gan and Hang et al., 2017 [7] |
| YD-4                                                      | Zhenyuan gold deposit | lamprophyres           | whole rock | 0.023 | 0.047 | 0.02  | 0.78  | 0.55  | n.a. | 1.42  | 2.04 | 0.06 | 23.91   | 0.71  | Gan and Hang et al., 2017 [7] |
| YD-5                                                      | Zhenyuan gold deposit | lamprophyres           | whole rock | 0.026 | 0.016 | 0.025 | 0.73  | 0.6   | n.a. | 1.40  | 0.62 | 0.02 | 23.08   | 0.82  | Gan and Hang et al., 2017 [7] |
| YD-7                                                      | Zhenyuan gold deposit | lamprophyres           | whole rock | 0.137 | 0.032 | 0.096 | 2.47  | 2.55  | n.a. | 5.29  | 0.23 | 0.01 | 18.61   | 1.03  | Gan and Hang et al., 2017 [7] |

|          |                       |                |            |        |        |        |       |       |        |       |      |      |       |      |                               |
|----------|-----------------------|----------------|------------|--------|--------|--------|-------|-------|--------|-------|------|------|-------|------|-------------------------------|
| YD-7     | Zhenyuan gold deposit | lamprophyres   | whole rock | 0.12   | 0.03   | 0.10   | 2.90  | 2.57  | n.a.   | 5.72  | 0.24 | 0.01 | 21.21 | 0.89 | Gan and Hang et al., 2017 [7] |
| YD-8     | Zhenyuan gold deposit | lamprophyres   | whole rock | 0.2    | 0.048  | 0.11   | 2.37  | 2.51  | n.a.   | 5.24  | 0.24 | 0.02 | 12.55 | 1.06 | Gan and Hang et al., 2017 [7] |
| YD-9     | Zhenyuan gold deposit | lamprophyres   | whole rock | 0.11   | 0.029  | 0.1    | 2.45  | 2.34  | n.a.   | 5.03  | 0.26 | 0.01 | 21.27 | 0.96 | Gan and Hang et al., 2017 [7] |
| YD-10    | Zhenyuan gold deposit | lamprophyres   | whole rock | 0.1    | 0.009  | 0.093  | 2.06  | 2.17  | n.a.   | 4.43  | 0.09 | 0.00 | 21.70 | 1.05 | Gan and Hang et al., 2017 [7] |
| YD-11    | Zhenyuan gold deposit | lamprophyres   | whole rock | 0.036  | 0.012  | 0.074  | 1.19  | 1.44  | n.a.   | 2.75  | 0.33 | 0.01 | 40.00 | 1.21 | Gan and Hang et al., 2017 [7] |
| YD-12    | Zhenyuan gold deposit | lamprophyres   | whole rock | 0.043  | 0.035  | 0.1    | 1.42  | 2.85  | n.a.   | 4.45  | 0.81 | 0.02 | 66.28 | 2.01 | Gan and Hang et al., 2017 [7] |
| YD-13    | Zhenyuan gold deposit | lamprophyres   | whole rock | 0.075  | 0.044  | 0.15   | 3.01  | 3.77  | n.a.   | 7.05  | 0.59 | 0.01 | 50.27 | 1.25 | Gan and Hang et al., 2017 [7] |
| YD-13    | Zhenyuan gold deposit | lamprophyres   | whole rock | 0.066  | 0.023  | 0.171  | 3.370 | 3.436 | n.a.   | 7.07  | 0.35 | 0.01 | 52.40 | 1.02 | Gan and Hang et al., 2017 [7] |
| YD-14    | Zhenyuan gold deposit | lamprophyres   | whole rock | 0.11   | 0.049  | 0.11   | 1.65  | 1.79  | n.a.   | 3.71  | 0.45 | 0.03 | 16.27 | 1.08 | Gan and Hang et al., 2017 [7] |
| YD-15    | Zhenyuan gold deposit | lamprophyres   | whole rock | 0.01   | 0.024  | 0.019  | 0.29  | 0.33  | n.a.   | 0.67  | 2.40 | 0.08 | 33.00 | 1.14 | Gan and Hang et al., 2017 [7] |
| YD-16    | Zhenyuan gold deposit | lamprophyres   | whole rock | 0.023  | 0.054  | 0.033  | 0.47  | 0.72  | n.a.   | 1.30  | 2.35 | 0.11 | 31.30 | 1.53 | Gan and Hang et al., 2017 [7] |
| YD-17    | Zhenyuan gold deposit | lamprophyres   | whole rock | 0.051  | 0.036  | 0.11   | 3.55  | 3.74  | n.a.   | 7.49  | 0.71 | 0.01 | 73.33 | 1.05 | Gan and Hang et al., 2017 [7] |
| YD-19    | Zhenyuan gold deposit | lamprophyres   | whole rock | 0.17   | 0.21   | 0.11   | 2.57  | 2.54  | n.a.   | 5.60  | 1.24 | 0.08 | 14.94 | 0.99 | Gan and Hang et al., 2017 [7] |
| YD-20    | Zhenyuan gold deposit | lamprophyres   | whole rock | 0.021  | 0.024  | 0.014  | 0.1   | 0.14  | n.a.   | 0.30  | 1.14 | 0.24 | 6.67  | 1.40 | Gan and Hang et al., 2017 [7] |
| YD-21    | Zhenyuan gold deposit | lamprophyres   | whole rock | 0.043  | 0.043  | 0.16   | 3.24  | 3.41  | n.a.   | 6.90  | 1.00 | 0.01 | 79.30 | 1.05 | Gan and Hang et al., 2017 [7] |
| YD-22    | Zhenyuan gold deposit | lamprophyres   | whole rock | 0.1    | 0.02   | 0.17   | 3.14  | 2.93  | n.a.   | 6.36  | 0.20 | 0.01 | 29.30 | 0.93 | Gan and Hang et al., 2017 [7] |
| YD-23    | Zhenyuan gold deposit | lamprophyres   | whole rock | 0.059  | 0.033  | 0.21   | 4.47  | 4.31  | n.a.   | 9.08  | 0.56 | 0.01 | 73.05 | 0.96 | Gan and Hang et al., 2017 [7] |
| RA95-3   | Argentina             | volcanic rocks | whole rock | 0.0014 | 0.0047 | 0.0012 | 0.033 | 0.017 | n.a.   | 0.06  | 3.36 | 0.14 | 12.14 | 0.52 | Park et al., 2019             |
| P17-4    | Argentina             | volcanic rocks | whole rock | 0.0098 | 0.002  | 0.0011 | 0.071 | 0.046 | n.a.   | 0.13  | 0.20 | 0.03 | 4.69  | 0.65 | Park et al., 2019             |
| P17-6    | Argentina             | volcanic rocks | whole rock | 0.0281 | 0.0179 | 0.0183 | 0.344 | 0.214 | n.a.   | 0.62  | 0.64 | 0.05 | 7.62  | 0.62 | Park et al., 2019             |
| 2208-483 | Victoria              | gabbro         | whole rock | 0.07   | 0.09   | 0.13   | 3.64  | 4.48  | 26.97  | 8.41  | 1.29 | 0.02 | 64.00 | 1.23 | Jowitt et al., 2012 [8]       |
| 2208-484 | Victoria              | gabbro         | whole rock | 0.28   | 0.44   | 0.46   | 11.37 | 16.9  | 113.52 | 29.45 | 1.57 | 0.04 | 60.36 | 1.49 | Jowitt et al., 2012 [8]       |
| 2208-485 | Victoria              | gabbro         | whole rock | 0.24   | 0.41   | 0.39   | 8.7   | 12.46 | 28.81  | 22.2  | 1.71 | 0.05 | 51.92 | 1.43 | Jowitt et al., 2012 [8]       |
| 2208-486 | Victoria              | gabbro         | whole rock | 0.15   | 0.2    | 0.23   | 5.71  | 6.62  | 24.03  | 12.91 | 1.33 | 0.04 | 44.13 | 1.16 | Jowitt et al., 2012 [8]       |
| 128198   | Yilgarn Craton        | lamprophyres   | whole rock | 0.33   | 0.26   | 0.26   | 3.07  | 2.7   | 13.81  | 6.62  | 0.79 | 0.08 | 8.18  | 0.88 | Choi et al., 2020 [9]         |
| 128200   | Yilgarn Craton        | lamprophyres   | whole rock | 0.11   | 0.09   | 0.26   | 2.03  | 1.42  | 5.7    | 3.91  | 0.82 | 0.04 | 12.91 | 0.70 | Choi et al., 2020 [9]         |
| JD3-1    | Yilgarn Craton        | lamprophyres   | whole rock | 0.24   | 0.43   | 0.43   | 4.31  | 4.72  | 2.44   | 10.13 | 1.79 | 0.10 | 19.67 | 1.10 | Choi et al., 2020 [9]         |
| Z36408   | Yilgarn Craton        | lamprophyres   | whole rock | 0.17   | 0.29   | 0.26   | 4.3   | 1.86  | 2.5    | 6.88  | 1.71 | 0.07 | 10.94 | 0.43 | Choi et al., 2020 [9]         |
| Z36413   | Yilgarn Craton        | lamprophyres   | whole rock | 0.17   | 0.26   | 0.28   | 2.82  | 1.16  | 0.5    | 4.69  | 1.53 | 0.09 | 6.82  | 0.41 | Choi et al., 2020 [9]         |
| Z36406   | Yilgarn Craton        | lamprophyres   | whole rock | 0.19   | 0.31   | 0.3    | 2.27  | 1.54  | 0.4    | 4.61  | 1.63 | 0.14 | 8.11  | 0.68 | Choi et al., 2020 [9]         |

**Mafic dike from subduction-metasomatized  
lithospheric mantle**

|            |                    |            |            |      |      |      |      |      |      |      |      |      |       |      |                       |
|------------|--------------------|------------|------------|------|------|------|------|------|------|------|------|------|-------|------|-----------------------|
| LKXDJ-3-1  | Jiaobei terrane    | mafic dike | whole rock | 0.03 | 0.05 | 0.03 | 0.57 | 0.47 | n.a. | 1.15 | 1.67 | 0.09 | 15.67 | 0.82 | Deng et al., 2017 [3] |
| LKXDJ-3-3  | Jiaobei terrane    | mafic dike | whole rock | 0.03 | 0.05 | 0.03 | 0.57 | 0.49 | n.a. | 1.17 | 1.67 | 0.09 | 16.33 | 0.86 | Deng et al., 2017 [3] |
| LKXDJ-3-4  | Jiaobei terrane    | mafic dike | whole rock | 0.03 | 0.05 | 0.04 | 0.68 | 0.52 | n.a. | 1.32 | 1.67 | 0.07 | 17.33 | 0.76 | Deng et al., 2017 [3] |
| LKXDJ-6-1  | Jiaobei terrane    | mafic dike | whole rock | 0.04 | 0.06 | 0.03 | 0.55 | 0.38 | n.a. | 1.06 | 1.50 | 0.11 | 9.50  | 0.69 | Deng et al., 2017 [3] |
| LKXDJ-6-3  | Jiaobei terrane    | mafic dike | whole rock | 0.04 | 0.05 | 0.03 | 0.46 | 0.37 | n.a. | 0.95 | 1.25 | 0.11 | 9.25  | 0.80 | Deng et al., 2017 [3] |
| LKXDJ-6-4  | Jiaobei terrane    | mafic dike | whole rock | 0.06 | 0.07 | 0.03 | 0.44 | 0.57 | n.a. | 1.17 | 1.17 | 0.16 | 9.50  | 1.30 | Deng et al., 2017 [3] |
| LKXDJ-6-5  | Jiaobei terrane    | mafic dike | whole rock | 0.02 | 0.04 | 0.02 | 0.35 | 0.29 | n.a. | 0.72 | 2.00 | 0.11 | 14.50 | 0.83 | Deng et al., 2017 [3] |
| ZYLL-5-3   | Jiaobei terrane    | mafic dike | whole rock | 0.08 | 0.1  | 0.06 | 1.06 | 1.06 | n.a. | 2.36 | 1.25 | 0.09 | 13.25 | 1.00 | Deng et al., 2017 [3] |
| ZYLL-7-1   | Jiaobei terrane    | mafic dike | whole rock | 0.06 | 0.09 | 0.06 | 0.91 | 0.97 | n.a. | 2.09 | 1.50 | 0.10 | 16.17 | 1.07 | Deng et al., 2017 [3] |
| ZYLL-7-2   | Jiaobei terrane    | mafic dike | whole rock | 0.11 | 0.2  | 0.08 | 1.31 | 1.5  | n.a. | 3.20 | 1.82 | 0.15 | 13.64 | 1.15 | Deng et al., 2017 [3] |
| ZYLL-7-3   | Jiaobei terrane    | mafic dike | whole rock | 0.16 | 0.37 | 0.08 | 1.26 | 1.37 | n.a. | 3.24 | 2.31 | 0.29 | 8.56  | 1.09 | Deng et al., 2017 [3] |
| ZYJL-1-1   | Jiaobei terrane    | mafic dike | whole rock | 0.03 | 0.07 | 0.03 | 0.42 | 0.44 | n.a. | 0.99 | 2.33 | 0.17 | 14.67 | 1.05 | Deng et al., 2017 [3] |
| ZYJL-1-2   | Jiaobei terrane    | mafic dike | whole rock | 0.05 | 0.08 | 0.05 | 0.5  | 0.43 | n.a. | 1.11 | 1.60 | 0.16 | 8.60  | 0.86 | Deng et al., 2017 [3] |
| LZYD-1-6   | Jiaobei terrane    | mafic dike | whole rock | 0.13 | 0.07 | 0.16 | 1.75 | 1.88 | n.a. | 3.99 | 0.54 | 0.04 | 14.46 | 1.07 | Deng et al., 2017 [3] |
| LZYD-1-7   | Jiaobei terrane    | mafic dike | whole rock | 0.18 | 0.09 | 0.15 | 2    | 1.81 | n.a. | 4.23 | 0.50 | 0.05 | 10.06 | 0.91 | Deng et al., 2017 [3] |
| LZYD-1-8   | Jiaobei terrane    | mafic dike | whole rock | 0.26 | 0.43 | 0.13 | 1.62 | 1.62 | n.a. | 4.06 | 1.65 | 0.27 | 6.23  | 1.00 | Deng et al., 2017 [3] |
| LZYD-1-9   | Jiaobei terrane    | mafic dike | whole rock | 0.08 | 0.05 | 0.08 | 1.71 | 1.36 | n.a. | 3.28 | 0.63 | 0.03 | 17.00 | 0.80 | Deng et al., 2017 [3] |
| LZYD-1-10  | Jiaobei terrane    | mafic dike | whole rock | 0.14 | 0.14 | 0.13 | 1.76 | 1.84 | n.a. | 4.01 | 1.00 | 0.08 | 13.14 | 1.05 | Deng et al., 2017 [3] |
| LZYD-4-1   | Jiaobei terrane    | mafic dike | whole rock | 0.04 | 0.1  | 0.02 | 0.32 | 0.32 | n.a. | 0.80 | 2.50 | 0.31 | 8.00  | 1.00 | Deng et al., 2017 [3] |
| LZYD-4-2   | Jiaobei terrane    | mafic dike | whole rock | 0.03 | 0.05 | 0.02 | 0.33 | 0.27 | n.a. | 0.70 | 1.67 | 0.15 | 9.00  | 0.82 | Deng et al., 2017 [3] |
| PDCZ-1-1   | Jiaobei terrane    | mafic dike | whole rock | 0.13 | 0.22 | 0.08 | 0.76 | 0.62 | n.a. | 1.81 | 1.69 | 0.29 | 4.77  | 0.82 | Deng et al., 2017 [3] |
| PDCZ-1-2   | Jiaobei terrane    | mafic dike | whole rock | 0.22 | 0.31 | 0.13 | 2.08 | 1.02 | n.a. | 3.76 | 1.41 | 0.15 | 4.64  | 0.49 | Deng et al., 2017 [3] |
| PDCZ-2-1   | Jiaobei terrane    | mafic dike | whole rock | 0.05 | 0.09 | 0.04 | 0.54 | 0.52 | n.a. | 1.24 | 1.80 | 0.17 | 10.40 | 0.96 | Deng et al., 2017 [3] |
| PDCZ-2-2   | Jiaobei terrane    | mafic dike | whole rock | 0.05 | 0.09 | 0.04 | 0.5  | 0.42 | n.a. | 1.10 | 1.80 | 0.18 | 8.40  | 0.84 | Deng et al., 2017 [3] |
| LXHL-1-1   | Jiaobei terrane    | mafic dike | whole rock | 0.02 | 0.04 | 0.02 | 0.32 | 0.26 | n.a. | 0.66 | 2.00 | 0.13 | 13.00 | 0.81 | Deng et al., 2017 [3] |
| MPYL-1-1   | Sulu orogenic belt | mafic dike | whole rock | 0.03 | 0.1  | 0.02 | 0.43 | 0.26 | n.a. | 0.84 | 3.33 | 0.23 | 8.67  | 0.60 | Deng et al., 2017 [3] |
| MPYL-1-2   | Sulu orogenic belt | mafic dike | whole rock | 0.03 | 0.08 | 0.03 | 0.47 | 0.39 | n.a. | 1.00 | 2.67 | 0.17 | 13.00 | 0.83 | Deng et al., 2017 [3] |
| MPYL-1-3   | Sulu orogenic belt | mafic dike | whole rock | 0.03 | 0.09 | 0.03 | 0.43 | 0.25 | n.a. | 0.83 | 3.00 | 0.21 | 8.33  | 0.58 | Deng et al., 2017 [3] |
| MPYL- 2-3  | Sulu orogenic belt | mafic dike | whole rock | 0.02 | 0.08 | 0.03 | 0.43 | 0.23 | n.a. | 0.79 | 4.00 | 0.19 | 11.50 | 0.53 | Deng et al., 2017 [3] |
| MPWGZ- 1-1 | Sulu orogenic belt | mafic dike | whole rock | 0.21 | 0.39 | 0.06 | 0.71 | 0.47 | n.a. | 1.84 | 1.86 | 0.55 | 2.24  | 0.66 | Deng et al., 2017 [3] |
| MPWGZ- 1-3 | Sulu orogenic belt | mafic dike | whole rock | 0.04 | 0.11 | 0.03 | 0.57 | 0.44 | n.a. | 1.19 | 2.75 | 0.19 | 11.00 | 0.77 | Deng et al., 2017 [3] |
| MPWGZ-1-5  | Sulu orogenic belt | mafic dike | whole rock | 0.07 | 0.19 | 0.05 | 0.75 | 0.56 | n.a. | 1.62 | 2.71 | 0.25 | 8.00  | 0.75 | Deng et al., 2017 [3] |
| LYGC-1-1   | Sulu orogenic belt | mafic dike | whole rock | 0.02 | 0.07 | 0.03 | 0.43 | 0.43 | n.a. | 0.98 | 3.50 | 0.16 | 21.50 | 1.00 | Deng et al., 2017 [3] |
| LYGC-1-2   | Sulu orogenic belt | mafic dike | whole rock | 0.03 | 0.06 | 0.03 | 0.4  | 0.44 | n.a. | 0.96 | 2.00 | 0.15 | 14.67 | 1.10 | Deng et al., 2017 [3] |
| LYGC-1-5   | Sulu orogenic belt | mafic dike | whole rock | 0.03 | 0.06 | 0.04 | 0.49 | 0.47 | n.a. | 1.09 | 2.00 | 0.12 | 15.67 | 0.96 | Deng et al., 2017 [3] |
| LYGC2-1    | Sulu orogenic belt | mafic dike | whole rock | 0.05 | 0.11 | 0.09 | 1.18 | 1.19 | n.a. | 2.62 | 2.20 | 0.09 | 23.80 | 1.01 | Deng et al., 2017 [3] |
| LYGC2-3    | Sulu orogenic belt | mafic dike | whole rock | 0.07 | 0.11 | 0.08 | 1.45 | 1.41 | n.a. | 3.12 | 1.57 | 0.08 | 20.14 | 0.97 | Deng et al., 2017 [3] |
| LYGC2-4    | Sulu orogenic belt | mafic dike | whole rock | 0.06 | 0.11 | 0.09 | 1.31 | 1.28 | n.a. | 2.85 | 1.83 | 0.08 | 21.33 | 0.98 | Deng et al., 2017 [3] |
| RSXC- 1-1  | Sulu orogenic belt | mafic dike | whole rock | 0.23 | 0.44 | 0.07 | 0.48 | 0.63 | n.a. | 1.85 | 1.91 | 0.92 | 2.74  | 1.31 | Deng et al., 2017 [3] |

**Table S3.** In situ trace elements of pyrites from the Aksu Neoproterozoic diabase dykes and lode gold deposits in Chinese South Tianshan (data in ppm).

| Sample no.  | Mineral | 197Au | 107Ag | 109Ag | 57Fe                  | 25Mg   | 27Al                | 29Si    | 43Ca                 | 49Ti    | 51V                | 53Cr              | 55Mn               | 59Co               | 60Ni               | 65Cu  | 66Zn              | 71Ga  | 72Ge  | 75As               | 77Se               | 95Mo  | 111Cd | 115In | 118Sn | 121Sb | 138Ba              | 184W  | 208Pb              | 209Bi | Reference  |
|-------------|---------|-------|-------|-------|-----------------------|--------|---------------------|---------|----------------------|---------|--------------------|-------------------|--------------------|--------------------|--------------------|-------|-------------------|-------|-------|--------------------|--------------------|-------|-------|-------|-------|-------|--------------------|-------|--------------------|-------|------------|
| AKSQ15-1-1  | Pyrite  | b.d.l | b.d.l | b.d.l | 445084.7 <sub>1</sub> | 23.42  | 986.48              | 6526.06 | 9415.48              | 8240.22 | 118.3 <sub>3</sub> | 2.53              | 4.56               | 184.8 <sub>1</sub> | 23.79              | 11.99 | b.d.l             | 0.32  | 3.16  | 539.6 <sub>5</sub> | 34.00              | 0.03  | 0.09  | 0.00  | 0.67  | 0.40  | 2.13               | 0.13  | 17.37              | 1.89  | This study |
| AKSQ15-1-2  | Pyrite  | 0.07  | b.d.l | b.d.l | 449553.7 <sub>5</sub> | 120.01 | 824.58              | 4886.40 | 7216.75              | 6576.73 | 99.15              | 1.72              | 8.01               | 144.0 <sub>1</sub> | 18.77              | 12.32 | 3.87              | 0.22  | 2.76  | 525.0 <sub>2</sub> | 33.13              | 0.08  | b.d.l | 0.01  | 0.50  | 0.82  | 8.15               | 0.21  | 30.93              | 2.16  | This study |
| AKSQ15-1-3  | Pyrite  | b.d.l | b.d.l | b.d.l | 464635.5 <sub>2</sub> | 10.54  | 4.97                | 333.28  | b.d.l                | 8.13    | b.d.l              | 1.42              | b.d.l              | 308.1 <sub>2</sub> | 47.55              | b.d.l | b.d.l             | b.d.l | 3.40  | 390.2 <sub>1</sub> | 49.93              | b.d.l | 0.10  | b.d.l | b.d.l | 0.79  | b.d.l              | b.d.l | 24.52              | 1.77  | This study |
| AKSQ22-1-4  | Pyrite  | b.d.l | 2.03  | 2.29  | 465313.9 <sub>2</sub> | 10.23  | 13.52               | b.d.l   | b.d.l                | 6.84    | b.d.l              | b.d.l             | 1.43               | 38.89              | 3.03               | 29.00 | b.d.l             | b.d.l | 2.89  | 118.5 <sub>9</sub> | 69.83              | b.d.l | b.d.l | b.d.l | b.d.l | 0.33  | 0.06               | b.d.l | 11.20              | 2.05  | This study |
| AKSQ22-1-5  | Pyrite  | b.d.l | b.d.l | b.d.l | 465106.3 <sub>7</sub> | 19.54  | 37.03               | b.d.l   | b.d.l                | 161.07  | 2.56               | b.d.l             | 2.04               | 23.03              | 5.86               | 5.90  | b.d.l             | b.d.l | 3.85  | 479.3 <sub>6</sub> | 58.59              | 0.16  | b.d.l | b.d.l | b.d.l | 0.88  | 1.74               | b.d.l | 11.57              | 1.54  | This study |
| AKSQ22-1-6  | Pyrite  | 0.05  | b.d.l | b.d.l | 464877.4 <sub>2</sub> | b.d.l  | 45.62               | 311.76  | b.d.l                | 7.21    | 0.06               | b.d.l             | b.d.l              | 97.36              | 130.4 <sub>6</sub> | 0.76  | b.d.l             | b.d.l | 2.23  | 12.54              | 32.40              | b.d.l | b.d.l | b.d.l | b.d.l | 0.15  | 0.53               | 0.10  | 1.06               | 0.14  | This study |
| AKSQ22-1-7  | Pyrite  | b.d.l | b.d.l | b.d.l | 465253.0 <sub>2</sub> | b.d.l  | b.d.l               | b.d.l   | b.d.l                | 7.88    | b.d.l              | b.d.l             | b.d.l              | 18.42              | 6.55               | b.d.l | 2.28              | 0.04  | 2.92  | 603.3 <sub>8</sub> | 54.14              | b.d.l | b.d.l | b.d.l | 0.06  | b.d.l | b.d.l              | b.d.l | 0.37               | 0.04  | This study |
| AKSQ22-1-8  | Pyrite  | 0.34  | 17.50 | 6.31  | 395990.6 <sub>3</sub> | 94.92  | 1376.95             | 5035.2  | 19062.2 <sub>7</sub> | 64.66   | 40.52              | 36.3 <sub>9</sub> | 76.66              | 269.6 <sub>9</sub> | 43.19              | 201.5 | 11.8              | 4.41  | 5.10  | 574.1 <sub>1</sub> | 101.6 <sub>4</sub> | 0.92  | 11.89 | 0.10  | 1.81  | 4.37  | 10.21              | 0.23  | 171.1 <sub>6</sub> | 4.65  | This study |
| AKSQ23-1-9  | Pyrite  | 0.02  | b.d.l | b.d.l | 464752.1 <sub>4</sub> | 10.62  | 18.04               | 238.64  | b.d.l                | 5.16    | 0.13               | 2.37              | 1.12               | 261.7 <sub>4</sub> | 52.31              | 2.40  | 1.15              | b.d.l | 2.54  | 446.8 <sub>6</sub> | 36.37              | 0.05  | b.d.l | 0.00  | b.d.l | 0.51  | 0.02               | b.d.l | 18.67              | 0.69  | This study |
| AKSQ23-1-10 | Pyrite  | b.d.l | b.d.l | b.d.l | 465396.3 <sub>8</sub> | b.d.l  | 4.08                | b.d.l   | b.d.l                | 28.16   | 1.43               | b.d.l             | b.d.l              | 2.80               | 1.08               | b.d.l | b.d.l             | 0.04  | 2.24  | 108.0 <sub>9</sub> | 43.20              | b.d.l | b.d.l | b.d.l | b.d.l | b.d.l | b.d.l              | b.d.l | 4.67               | 0.43  | This study |
| AKSQ23-1-11 | Pyrite  | b.d.l | b.d.l | b.d.l | 465114.6 <sub>9</sub> | b.d.l  | b.d.l               | 192.82  | b.d.l                | 13.53   | b.d.l              | b.d.l             | 0.62               | 83.44              | 57.32              | b.d.l | b.d.l             | 0.11  | 3.21  | 28.42              | 25.56              | b.d.l | b.d.l | b.d.l | b.d.l | b.d.l | b.d.l              | b.d.l | 0.95               | 0.05  | This study |
| AKSQ23-1-12 | Pyrite  | b.d.l | b.d.l | b.d.l | 451744.8 <sub>1</sub> | 69.82  | 679.18              | 4399.04 | 6136.61              | 5566.25 | 117.6 <sub>0</sub> | 24.0 <sub>4</sub> | 5.43               | 112.1 <sub>5</sub> | 32.53              | 16.56 | 2.20              | 0.25  | 3.46  | 318.1 <sub>5</sub> | 28.87              | 0.02  | b.d.l | b.d.l | 0.27  | 1.08  | 1.46               | 0.06  | 30.16              | 1.17  | This study |
| AKSQ23-1-13 | Pyrite  | 0.03  | b.d.l | b.d.l | 465355.2 <sub>2</sub> | 0.79   | 2.15                | b.d.l   | b.d.l                | 8.03    | b.d.l              | b.d.l             | 0.61               | 29.36              | 2.65               | 1.48  | b.d.l             | b.d.l | 3.01  | 212.1 <sub>4</sub> | 47.07              | b.d.l | 0.15  | b.d.l | b.d.l | 0.20  | 0.02               | b.d.l | 4.87               | 0.24  | This study |
| AKSQ23-1-14 | Pyrite  | 0.02  | b.d.l | b.d.l | 463124.4 <sub>3</sub> | 1.60   | 2.65                | 2177.14 | b.d.l                | 9.54    | b.d.l              | b.d.l             | b.d.l              | 28.65              | 4.81               | 2.71  | b.d.l             | 0.04  | 2.86  | 418.3 <sub>5</sub> | 35.45              | b.d.l | b.d.l | b.d.l | b.d.l | b.d.l | b.d.l              | b.d.l | 14.16              | 1.32  | This study |
| AKSQ23-1-15 | Pyrite  | b.d.l | b.d.l | b.d.l | 447728.93             | 952.44 | 850.5 <sub>6</sub>  | 7454.85 | 1512.84              | 2129.68 | 25.25              | b.d.l             | 189.54             | 134.9 <sub>8</sub> | 15.31              | 19.61 | 29.1 <sub>5</sub> | 2.74  | b.d.l | 233.1 <sub>7</sub> | 58.44              | b.d.l | b.d.l | b.d.l | b.d.l | 1.21  | 22.02              | b.d.l | 13.43              | 0.49  | This study |
| AKSQ23-1-16 | Pyrite  | 0.30  | 3.96  | 3.00  | 444604.7 <sub>0</sub> | 550.99 | 1404.4 <sub>2</sub> | 6751.14 | 7497.68              | 8065.05 | 115.7 <sub>8</sub> | 2.35              | 23.19              | 473.0 <sub>3</sub> | 116.3              | 377.6 | 13.3              | 0.46  | 2.03  | 200.7 <sub>5</sub> | 64.35              | b.d.l | b.d.l | b.d.l | 0.52  | 2.54  | 297.5 <sub>7</sub> | 0.41  | 106.3 <sub>0</sub> | 6.70  | This study |
| AKSQ23-1-17 | Pyrite  | b.d.l | b.d.l | b.d.l | 371770.7 <sub>1</sub> | 750.93 | 841.38              | 5726.51 | #####                | 5677.34 | 124.3 <sub>7</sub> | 2.20              | 283.5 <sub>7</sub> | 223.7 <sub>3</sub> | 75.16              | 120.3 | 12.5 <sub>8</sub> | 3.28  | 4.09  | 75.42              | 63.59              | 0.06  | b.d.l | 0.01  | 0.50  | b.d.l | 39.68              | 0.29  | 20.61              | 2.16  | This study |
| AKSQ23-1-18 | Pyrite  | 0.01  | 0.79  | b.d.l | 464294.0 <sub>5</sub> | 98.95  | 24.69               | 566.76  | 286.40               | 10.75   | 1.89               | b.d.l             | 6.94               | 181.8 <sub>1</sub> | 72.97              | 1.02  | b.d.l             | b.d.l | 2.32  | 179.6 <sub>4</sub> | 43.37              | b.d.l | 0.08  | b.d.l | b.d.l | b.d.l | 0.07               | b.d.l | 5.23               | 0.13  | This study |
| AKSQ23-1-19 | Pyrite  | 0.04  | b.d.l | b.d.l | 465343.9 <sub>1</sub> | 6.16   | 2.53                | b.d.l   | b.d.l                | 4.85    | 0.16               | b.d.l             | 1.25               | 40.45              | 16.78              | 4.35  | b.d.l             | b.d.l | 2.18  | 141.8 <sub>5</sub> | 40.89              | b.d.l | b.d.l | b.d.l | 0.04  | b.d.l | b.d.l              | b.d.l | 9.03               | 0.40  | This study |
| AKSQ23-1-20 | Pyrite  | b.d.l | b.d.l | b.d.l | 465134.3 <sub>1</sub> | b.d.l  | 21.63               | b.d.l   | b.d.l                | 8.72    | b.d.l              | b.d.l             | b.d.l              | 227.7 <sub>2</sub> | 28.86              | b.d.l | b.d.l             | 0.18  | 3.69  | 161.2 <sub>5</sub> | 52.41              | b.d.l | b.d.l | b.d.l | b.d.l | b.d.l | 3.00               | b.d.l | 0.75               | 0.06  | This study |
| AKSQ23-1-21 | Pyrite  | b.d.l | b.d.l | b.d.l | 465039.3 <sub>7</sub> | b.d.l  | b.d.l               | 225.59  | 243.73               | 8.44    | b.d.l              | b.d.l             | b.d.l              | 1.04               | 6.53               | b.d.l | 2.10              | b.d.l | 1.96  | 85.69              | 30.07              | 0.04  | 0.16  | b.d.l | b.d.l | b.d.l | b.d.l              | b.d.l | 0.89               | 0.12  | This study |



|             |        |       |       |       |               |        |             |              |              |              |            |           |       |            |       |       |           |           |           |            |       |           |       |           |       |       |       |           |       |           |                            |
|-------------|--------|-------|-------|-------|---------------|--------|-------------|--------------|--------------|--------------|------------|-----------|-------|------------|-------|-------|-----------|-----------|-----------|------------|-------|-----------|-------|-----------|-------|-------|-------|-----------|-------|-----------|----------------------------|
| AKSQ23-1-22 | Pyrite | b.d.l | b.d.l | b.d.l | 465390.3<br>0 | 7.44   | 3.06        | b.d.l        | b.d.l        | 5.13         | 0.09       | b.d.l     | 1.22  | 13.99      | 16.89 | 1.44  | b.d.l     | 0.06      | 3.12      | 75.34      | 35.81 | b.d.l     | b.d.l | 0.01      | b.d.l | 0.59  | 0.07  | b.d.l     | 6.77  | 0.49      | This study                 |
| AKSQ23-1-23 | Pyrite | 0.07  | b.d.l | b.d.l | 465381.6<br>3 | 7.71   | 9.78        | b.d.l        | b.d.l        | 10.83        | b.d.l      | b.d.l     | b.d.l | 13.71      | 3.44  | 4.48  | b.d.l     | b.d.l     | 2.78      | 110.6<br>9 | 51.80 | 0.11      | b.d.l | b.d.l     | b.d.l | b.d.l | b.d.l | b.d.l     | 0.53  | 0.13      | This study                 |
| AKSQ23-1-24 | Pyrite | b.d.l | b.d.l | 0.71  | 465058.7<br>7 | b.d.l  | b.d.l       | 221.85       | b.d.l        | 7.44         | b.d.l      | b.d.l     | b.d.l | 70.45      | 23.52 | 1.28  | b.d.l     | b.d.l     | 2.36      | 291.2<br>0 | 44.85 | b.d.l     | b.d.l | 0.01      | 0.09  | 0.17  | b.d.l | b.d.l     | 1.82  | 0.11      | This study                 |
| AKSQ23-1-25 | Pyrite | 0.04  | b.d.l | b.d.l | 464931.7<br>4 | 27.83  | 2.89        | 265.71       | b.d.l        | 4.91         | 0.28       | b.d.l     | 3.63  | 141.6<br>2 | 44.13 | 2.21  | 1.47      | b.d.l     | 2.97      | 139.2<br>9 | 45.54 | b.d.l     | b.d.l | 0.01      | b.d.l | 0.61  | b.d.l | b.d.l     | 11.93 | 0.75      | This study                 |
| AKSQ23-1-26 | Pyrite | b.d.l | b.d.l | b.d.l | 465100.4<br>9 | b.d.l  | b.d.l       | 211.00       | b.d.l        | 6.31         | b.d.l      | b.d.l     | b.d.l | 60.76      | 44.09 | 1.22  | b.d.l     | b.d.l     | 3.14      | 138.7<br>5 | 43.46 | b.d.l     | b.d.l | b.d.l     | b.d.l | b.d.l | 0.01  | 0.02      | 1.80  | 0.11      | This study                 |
| AKSQ23-1-27 | Pyrite | b.d.l | b.d.l | b.d.l | 464935.8<br>4 | b.d.l  | 5.73        | 164.74       | b.d.l        | 5.62         | 0.04       | b.d.l     | b.d.l | 271.5<br>0 | 52.49 | b.d.l | 2.36      | 0.02      | 2.89      | 118.0<br>6 | 40.28 | 0.03      | b.d.l | b.d.l     | 0.06  | 0.15  | 0.01  | b.d.l     | 1.10  | 0.10      | This study                 |
| AKSQ23-1-28 | Pyrite | 0.10  | b.d.l | b.d.l | 415194.8<br>0 | 186.28 | 2523.8<br>9 | 15934.2<br>6 | 22115.3<br>0 | 22074.2<br>7 | 432.6<br>1 | 10.3<br>3 | 16.28 | 79.30      | 15.26 | 33.53 | 3.73      | 0.89      | 1.69      | 108.7<br>9 | 31.07 | 0.22      | b.d.l | 0.01      | 2.00  | 0.61  | 5.75  | 0.36      | 22.25 | 1.09      | This study                 |
| CN1_9       | Pyrite | n.a.  | 0.299 | 0.299 | 484032        | 1.486  | 0.791       | 213.5        | 41.22        | 36.19        | b.d.l      | 2.10<br>2 | 3.944 | 0.394      | b.d.l | 3.915 | 7.86<br>3 | 0.10<br>5 | 4.41<br>4 | 1252       | n.a.  | 0.16<br>8 | b.d.l | 0.05<br>4 | b.d.l | 0.96  | 0.273 | b.d.l     | 0.336 | 0.08<br>2 | Zhang et al., 2022<br>[10] |
| CN1_6       | Pyrite | n.a.  | 0.178 | 0.178 | 497812        | 4.662  | 595         | 869.8        | 37.03        | 32.52        | 0.844      | 4.81<br>1 | 5.038 | 691.3      | 327.7 | 3.888 | 6.78<br>4 | 0.08<br>1 | 3.41<br>1 | 9230       | n.a.  | 0.09<br>5 | b.d.l | 0.02<br>3 | 0.331 | 7.436 | 1.852 | 94.2<br>5 | 782.9 | 4.21<br>8 | Zhang et al., 2022<br>[10] |
| CN1_7       | Pyrite | n.a.  | b.d.l | b.d.l | 467810        | b.d.l  | 9.275       | 211.6        | 13.16        | 38.04        | b.d.l      | 2.23      | 3.432 | 0.268      | 27.13 | 2.552 | 14.4<br>7 | b.d.l     | 2.39<br>3 | 9064       | n.a.  | 0.12<br>4 | 0.229 | b.d.l     | b.d.l | 1.648 | b.d.l | 1.03<br>5 | 0.936 | 0.29<br>5 | Zhang et al., 2022<br>[10] |
| CN1_8       | Pyrite | n.a.  | 0.033 | 0.033 | 463930        | 94.57  | 31.32       | 668.3        | 5.196        | 33.64        | b.d.l      | 2.49<br>9 | 3.903 | 0.661      | 1.987 | 2.947 | 9.21<br>6 | b.d.l     | 2.86<br>8 | 8889       | n.a.  | 0.11<br>7 | 0.267 | 0.01<br>1 | b.d.l | 2.952 | b.d.l | b.d.l     | 3.695 | 2.15<br>9 | Zhang et al., 2022<br>[10] |
| CN8_1       | Pyrite | n.a.  | 2.503 | 2.503 | 528594        | 5.077  | 0.116       | 1312         | 6.902        | 19.93        | b.d.l      | 5.58<br>9 | 3.496 | 9.619      | 470.4 | 9.356 | 6.22      | b.d.l     | 2.44<br>7 | 275.8      | n.a.  | 0.05<br>9 | b.d.l | b.d.l     | b.d.l | 242.1 | b.d.l | b.d.l     | 221.1 | 12.3<br>2 | Zhang et al., 2022<br>[10] |
| CN8_2       | Pyrite | n.a.  | 0.691 | 0.691 | 525453        | 1.859  | 1.634       | 269.5        | b.d.l        | 23.43        | 0.079      | 2.54<br>7 | 3.685 | 9.351      | 302.3 | 3.224 | 5.62<br>6 | 0.09<br>6 | 2.83      | 66.99      | n.a.  | 0.01<br>5 | 0.213 | 0.01<br>9 | 0.515 | 28.87 | b.d.l | 0.01<br>8 | 20.23 | 1.96<br>5 | Zhang et al., 2022<br>[10] |
| CN8_3       | Pyrite | n.a.  | 0.176 | 0.176 | 506964        | 2.814  | 2.879       | 232          | 25.2         | 28.46        | 0.07       | 2.67      | 3.797 | 1.097      | 41.42 | 1.939 | 5.23<br>1 | 0.18<br>9 | 1.62<br>1 | 25.62      | n.a.  | 0.01<br>7 | b.d.l | 0.13<br>6 | b.d.l | 0.6   | b.d.l | 0.02<br>6 | 4.323 | 0.04<br>9 | Zhang et al., 2022<br>[10] |
| CN8_4       | Pyrite | n.a.  | 0.65  | 0.65  | 506171        | b.d.l  | 0.77        | 202.3        | 11.33        | 26.17        | 0.095      | 2.02<br>1 | 41.84 | 0.119      | 25.27 | 3.331 | 6.10<br>8 | b.d.l     | 3.23<br>4 | 567.1      | n.a.  | b.d.l     | 0.033 | b.d.l     | 0.091 | 23.73 | b.d.l | b.d.l     | 7.91  | 0.42      | Zhang et al., 2022<br>[10] |
| CN8_5       | Pyrite | n.a.  | 0.58  | 0.58  | 516397        | 2.59   | b.d.l       | 197.3        | 4.444        | 27.98        | 0.068      | 5.83<br>8 | 4.009 | 0.125      | 9.304 | 4.756 | 5.83<br>9 | 0.02<br>8 | 2.66<br>2 | 161.4      | n.a.  | b.d.l     | 0.266 | 0.00<br>4 | b.d.l | 36.23 | 0.074 | 0.01<br>8 | 37.61 | 1.43      | Zhang et al., 2022<br>[10] |
| CN8_9       | Pyrite | n.a.  | 5.76  | 5.76  | 497585        | 0.528  | b.d.l       | 167.8        | 1.89         | 28.24        | b.d.l      | 3.61<br>2 | 3.592 | 0.205      | 24.93 | 10.65 | 5.98<br>7 | b.d.l     | 3.31<br>9 | 49.94      | n.a.  | 0.13<br>2 | 0.051 | 0.01      | 0.392 | 47.69 | 0.08  | b.d.l     | 43.87 | 3.82<br>9 | Zhang et al., 2022<br>[10] |
| CN8_10      | Pyrite | n.a.  | 2.17  | 2.17  | 503551        | 2.854  | 8.74        | 328.1        | 13.89        | 29.61        | 0.062      | 7.08<br>2 | 5.236 | 15.94      | 58.66 | 10.19 | 5.89<br>2 | 0.05<br>3 | 2.47<br>4 | 5033       | n.a.  | b.d.l     | b.d.l | b.d.l     | 0.454 | 54.75 | 0.037 | b.d.l     | 107.5 | 4.10<br>9 | Zhang et al., 2022<br>[10] |
| CN8_11      | Pyrite | n.a.  | 75.65 | 75.65 | 503008        | 4.231  | b.d.l       | 175.6        | b.d.l        | 28.06        | 0.046      | 2.70<br>1 | 4.423 | 0.25       | b.d.l | 29.96 | 6.98<br>6 | b.d.l     | 1.85<br>6 | 417.8      | n.a.  | b.d.l     | 0.3   | 0.02<br>9 | 0.864 | 803   | 0.072 | b.d.l     | 1408  | 8.08<br>6 | Zhang et al., 2022<br>[10] |
| CN8_12      | Pyrite | n.a.  | b.d.l | b.d.l | 509263        | 0.61   | b.d.l       | 182.9        | b.d.l        | 27.97        | 0.056      | 2.39<br>4 | 3.492 | 0.114      | 1.62  | 2.448 | 8.56<br>8 | b.d.l     | 2.62<br>6 | 1552       | n.a.  | 0.12<br>5 | 0.09  | 0.02<br>1 | b.d.l | 6.601 | 0.016 | b.d.l     | 12.17 | 0.45<br>6 | Zhang et al., 2022<br>[10] |
| CN8_13      | Pyrite | n.a.  | 0.743 | 0.743 | 508710        | 1.502  | 28.88       | 345.2        | 10.47        | 32.22        | 0.28       | 5.51<br>5 | 5.316 | 0.356      | 50.22 | 3.707 | 6.31<br>8 | 0.11<br>5 | 2.82<br>9 | 200.1      | n.a.  | b.d.l     | 0.158 | 0.00<br>4 | 0.036 | 33.91 | 0.189 | 0.09<br>5 | 25.65 | 3.43<br>5 | Zhang et al., 2022<br>[10] |
| CN8_16      | Pyrite | n.a.  | 0.445 | 0.445 | 262049        | b.d.l  | b.d.l       | 251.5        | b.d.l        | 11.72        | 0.079      | 1.34<br>3 | 2.619 | 0.824      | 1.892 | 0.731 | 2.24<br>1 | b.d.l     | 2.67<br>1 | 54543<br>2 | n.a.  | b.d.l     | 0.284 | 0.49<br>1 | 0.198 | 1363  | 0.202 | b.d.l     | 0.751 | 2.27<br>8 | Zhang et al., 2022<br>[10] |
| CN8_17      | Pyrite | n.a.  | 1.044 | 1.044 | 238207        | 18.41  | b.d.l       | 326.9        | 63.81        | 7.419        | b.d.l      | 2.99<br>1 | 9.589 | 32.2       | 40.72 | 0.762 | 22.5<br>2 | b.d.l     | 2.21<br>8 | 56956<br>6 | n.a.  | 0.07<br>9 | 0.091 | 0.46      | 0.627 | 1992  | 0.625 | b.d.l     | 55.6  | 15.8<br>1 | Zhang et al., 2022<br>[10] |
| CN8_18      | Pyrite | n.a.  | 1.241 | 1.241 | 494595        | b.d.l  | 1.061       | 103.6        | 14.06        | 32.21        | 0.014      | 2.77<br>5 | 3.694 | 4.764      | 519.9 | 0.69  | 5.46<br>6 | b.d.l     | 2.88<br>6 | 2077       | n.a.  | 0.13<br>7 | 0.202 | 0.00<br>6 | 0.569 | 287.1 | b.d.l | b.d.l     | 432.5 | 11.4<br>5 | Zhang et al., 2022<br>[10] |

|        |        |      |       |       |        |       |       |       |       |       |       |                   |       |       |       |       |                   |                   |                   |       |      |                   |       |                   |       |        |                   |                   |                   |                         |                         |
|--------|--------|------|-------|-------|--------|-------|-------|-------|-------|-------|-------|-------------------|-------|-------|-------|-------|-------------------|-------------------|-------------------|-------|------|-------------------|-------|-------------------|-------|--------|-------------------|-------------------|-------------------|-------------------------|-------------------------|
| CN8_19 | Pyrite | n.a. | 0.874 | 0.874 | 484111 | b.d.l | b.d.l | 211.4 | b.d.l | 24.26 | 0.069 | 5.12 <sub>1</sub> | 3.46  | 1.572 | 61    | 3.248 | 5.15 <sub>7</sub> | 0.09 <sub>2</sub> | 3.07 <sub>9</sub> | 965.5 | n.a. | 0.06              | b.d.l | 0.01 <sub>2</sub> | 0.523 | 55.38  | b.d.l             | b.d.l             | 44.14             | 3.65 <sub>9</sub>       | Zhang et al., 2022 [10] |
| CN8_20 | Pyrite | n.a. | 0.195 | 0.195 | 507240 | 2.058 | 98.84 | 289.5 | 35.86 | 101.9 | 0.625 | 7.36 <sub>8</sub> | 3.988 | 0.097 | 18.47 | 3.577 | 4.68 <sub>7</sub> | 0.11 <sub>2</sub> | 4.52 <sub>8</sub> | 206.1 | n.a. | 0.07 <sub>9</sub> | 0.046 | 0.00 <sub>2</sub> | 0.349 | 2.654  | 0.507             | 1.35 <sub>4</sub> | 1.535             | 0.43 <sub>6</sub>       | Zhang et al., 2022 [10] |
| CN8_21 | Pyrite | n.a. | 1.208 | 1.208 | 503273 | 16.57 | 2.077 | 87.04 | 54.2  | 30.53 | 0.141 | 4.00 <sub>3</sub> | 7.671 | 0.175 | 22.92 | 4.594 | 14.0 <sub>2</sub> | b.d.l             | 2.88 <sub>7</sub> | 122   | n.a. | 0.06 <sub>7</sub> | b.d.l | 0.02 <sub>2</sub> | 0.394 | 58.4   | 0.124             | b.d.l             | 16.99             | 5.59 <sub>3</sub>       | Zhang et al., 2022 [10] |
| CN8_6  | Pyrite | n.a. | b.d.l | b.d.l | 510449 | 0.201 | b.d.l | 218.2 | b.d.l | 99.93 | 0.229 | 2.70 <sub>8</sub> | 3.62  | 7.218 | 377.6 | 2.42  | 4.66 <sub>7</sub> | 0.20 <sub>7</sub> | 3.66 <sub>6</sub> | 8526  | n.a. | 0.10 <sub>6</sub> | 0.071 | 0.00 <sub>1</sub> | b.d.l | 1.643  | b.d.l             | 4.79 <sub>9</sub> | 0.411             | 0.06 <sub>3</sub>       | Zhang et al., 2022 [10] |
| CN8_7  | Pyrite | n.a. | 3.197 | 3.197 | 526015 | 0.155 | 0.118 | 322.4 | b.d.l | 27.58 | b.d.l | 5.86 <sub>8</sub> | 5.82  | 3.019 | 169.8 | 9.353 | 6.17 <sub>4</sub> | b.d.l             | 2.29 <sub>6</sub> | 52.4  | n.a. | 0.10 <sub>1</sub> | 0.102 | 0.00 <sub>4</sub> | 0.175 | 69.54  | b.d.l             | b.d.l             | 64.46             | 3.71 <sub>3</sub>       | Zhang et al., 2022 [10] |
| CN8_8  | Pyrite | n.a. | 9.876 | 9.876 | 511813 | b.d.l | b.d.l | 272.3 | 0.039 | 32.74 | b.d.l | 13.7 <sub>2</sub> | 3.561 | 0.327 | 129.5 | 6.983 | 10.3 <sub>7</sub> | b.d.l             | 2.75 <sub>8</sub> | 29.5  | n.a. | 0.15 <sub>2</sub> | 0.124 | b.d.l             | 0.388 | 23.140 | 0.01 <sub>6</sub> | 24.51             | 2.07 <sub>2</sub> | Zhang et al., 2022 [10] |                         |
| CN8_22 | Pyrite | n.a. | 5.675 | 5.675 | 509539 | 54.04 | 3.459 | 227   | 0.444 | 34.04 | 0.031 | 3.65 <sub>6</sub> | 16.46 | 0.235 | 575.5 | 16.63 | 8.66 <sub>9</sub> | 0.11 <sub>6</sub> | 3.65 <sub>8</sub> | 241.5 | n.a. | b.d.l             | b.d.l | 0.02 <sub>5</sub> | 0.063 | 352.90 | 125               | b.d.l             | 247.6             | 24.0 <sub>8</sub>       | Zhang et al., 2022 [10] |
| CN8_23 | Pyrite | n.a. | 2.258 | 2.258 | 515526 | 9.449 | 61.64 | 248.1 | 25.5  | 27.31 | b.d.l | 5.14 <sub>9</sub> | 5.032 | 0.742 | 1170  | 7.457 | 6.05 <sub>2</sub> | 0.49 <sub>3</sub> | 3.54 <sub>8</sub> | 124.6 | n.a. | 0.39 <sub>3</sub> | 0.008 | 0.02 <sub>7</sub> | 0.319 | 56.240 | 143               | b.d.l             | 57.29             | 5.83 <sub>2</sub>       | Zhang et al., 2022 [10] |
| CN8_24 | Pyrite | n.a. | 3.073 | 3.073 | 497192 | b.d.l | 0.225 | 298.9 | b.d.l | 36.87 | 0.045 | 3.59 <sub>9</sub> | 4.16  | 0.133 | b.d.l | 8.412 | 7.04 <sub>9</sub> | 0.08 <sub>9</sub> | 2.82              | 89.37 | n.a. | b.d.l             | b.d.l | 0.00 <sub>9</sub> | b.d.l | 51.64  | b.d.l             | b.d.l             | 75.89             | 3.38 <sub>7</sub>       | Zhang et al., 2022 [10] |
| CN6_6  | Pyrite | n.a. | 1.951 | 1.951 | 475332 | b.d.l | 2.09  | 294.2 | b.d.l | 31.05 | 0.036 | 3.30 <sub>7</sub> | 2.783 | 0.114 | 1.8   | 2.327 | 4.69 <sub>2</sub> | b.d.l             | 3.70 <sub>2</sub> | 4114  | n.a. | b.d.l             | 0.067 | 0.01 <sub>4</sub> | b.d.l | 60.35  | b.d.l             | b.d.l             | 13.21             | 0.08 <sub>7</sub>       | Zhang et al., 2022 [10] |
| CN6_9  | Pyrite | n.a. | 0.211 | 0.211 | 485903 | 0.316 | 4.204 | 291.9 | 36.45 | 29.2  | 0.037 | 0.70 <sub>8</sub> | 3.4   | 0.382 | 6.489 | 10.57 | 5.77 <sub>4</sub> | b.d.l             | 2.85 <sub>2</sub> | 2733  | n.a. | b.d.l             | 0.157 | 0.02 <sub>7</sub> | b.d.l | 6.871  | b.d.l             | 0.04 <sub>3</sub> | 1.62              | 0.01 <sub>3</sub>       | Zhang et al., 2022 [10] |
| CN12_4 | Pyrite | n.a. | 0.274 | 0.274 | 471461 | b.d.l | 138.8 | 134.7 | 27.74 | 36.92 | 0.153 | 1.47 <sub>8</sub> | 3.058 | 0.323 | b.d.l | 2.864 | 7.46              | b.d.l             | 2.31 <sub>2</sub> | 908   | n.a. | 0.01 <sub>9</sub> | b.d.l | 0.02              | b.d.l | 10.86  | 0.267             | b.d.l             | 8.162             | 0.01 <sub>5</sub>       | Zhang et al., 2022 [10] |
| CN12_5 | Pyrite | n.a. | 0.079 | 0.079 | 477733 | 2.682 | 216.3 | 295.4 | b.d.l | 34.17 | b.d.l | 1.32 <sub>9</sub> | 3.817 | 0.142 | b.d.l | 1.683 | 8.41 <sub>2</sub> | b.d.l             | 3.70 <sub>7</sub> | 243   | n.a. | b.d.l             | 0.004 | 0.02 <sub>1</sub> | 0.553 | 13.63  | 0.779             | 0.11 <sub>9</sub> | 9.764             | 0.07 <sub>9</sub>       | Zhang et al., 2022 [10] |
| CN12_6 | Pyrite | n.a. | 0.663 | 0.663 | 474988 | 1.59  | 306   | 580   | 20.8  | 28.43 | 0.021 | 3.15 <sub>5</sub> | 3.464 | 0.781 | 14.97 | 1.852 | 6.01 <sub>3</sub> | 0.15 <sub>1</sub> | 3.26 <sub>1</sub> | 621.1 | n.a. | 0.1               | 0.195 | b.d.l             | 0.545 | 22.48  | 0.559             | 0.03 <sub>1</sub> | 22.07             | 0.05 <sub>4</sub>       | Zhang et al., 2022 [10] |
| CN12_7 | Pyrite | n.a. | 3.222 | 3.222 | 496310 | 2.225 | 6.977 | 159.8 | 35.57 | 31.83 | 0.218 | 5.81 <sub>1</sub> | 3.432 | 5.91  | 10.91 | 5.454 | 8.18 <sub>1</sub> | b.d.l             | 3.28 <sub>7</sub> | 213.3 | n.a. | b.d.l             | 0.045 | 0.00 <sub>2</sub> | b.d.l | 76.58  | 0.024             | 9.19 <sub>5</sub> | 86.15             | 0.13 <sub>5</sub>       | Zhang et al., 2022 [10] |
| CN12_9 | Pyrite | n.a. | 3.864 | 3.864 | 472235 | 19.1  | 4.515 | 199.2 | 0.872 | 30.7  | 0.014 | 1.47 <sub>9</sub> | 3.683 | 0.243 | 1.344 | 7.143 | 7.12 <sub>9</sub> | 0.07 <sub>4</sub> | 4.35 <sub>9</sub> | 1328  | n.a. | 0.00 <sub>9</sub> | 0.187 | 0.04 <sub>8</sub> | b.d.l | 185.3  | 0.039             | b.d.l             | 233.8             | 0.14 <sub>9</sub>       | Zhang et al., 2022 [10] |
| CN6_7  | Pyrite | n.a. | b.d.l | b.d.l | 476875 | b.d.l | b.d.l | 285   | 12.39 | 29.77 | 0.064 | 7.99 <sub>8</sub> | 3.199 | 263.7 | 132.1 | 1.049 | 6.89 <sub>7</sub> | 0.26 <sub>6</sub> | 3.96 <sub>1</sub> | 2132  | n.a. | 0.00 <sub>7</sub> | 0.107 | b.d.l             | 0.063 | 2.213  | 0.097             | 0.02 <sub>1</sub> | 1.041             | 1.76                    | Zhang et al., 2022 [10] |
| CN6_8  | Pyrite | n.a. | 0.032 | 0.032 | 498206 | b.d.l | 0.604 | 310.6 | b.d.l | 30.62 | b.d.l | 4.34 <sub>2</sub> | 3.709 | 0.478 | 35.23 | 1.304 | 5.94 <sub>3</sub> | b.d.l             | 3.6               | 2734  | n.a. | 0.12 <sub>1</sub> | 0.105 | b.d.l             | 0.488 | 0.768  | b.d.l             | 0.04 <sub>6</sub> | 1.275             | b.d.l                   | Zhang et al., 2022 [10] |

n.a. represents no analyzed data.

**Table S4.** Compilation of in-situ Au and Ag contents of pyrite from Patagonian mantle xenoliths and Jiaodong gold provinces (data in ppm).

| Sample no.    | Gold deposit                | Mineral      | Au197 | Ag107  | Au/Ag ratio | Reference                 |
|---------------|-----------------------------|--------------|-------|--------|-------------|---------------------------|
| AKSQ22-1 - 4  | Neoproterozoic diabase      | Pyrite       | 0     | 2.03   | 0           | This study                |
| AKSQ22-1 - 8  | Neoproterozoic diabase      | Pyrite       | 0.34  | 17.5   | 0.02        | This study                |
| AKSQ23-1 - 16 | Neoproterozoic diabase      | Pyrite       | 0.3   | 3.96   | 0.08        | This study                |
| AKSQ23-1 - 18 | Neoproterozoic diabase      | Pyrite       | 0.01  | 0.79   | 0.01        | This study                |
| awanda-03     | Aawanda gold deposit        | Pyrite       | 0.05  | 0.58   | 0.09        | This study                |
| awanda-06     | Aawanda gold deposit        | Pyrite       | 0.04  | 0.44   | 0.10        | This study                |
| awanda-08     | Aawanda gold deposit        | Pyrite       | 0.37  | 0.09   | 4.40        | This study                |
| awanda-09     | Aawanda gold deposit        | Pyrite       | 0.02  | 0.43   | 0.05        | This study                |
| awanda-17     | Aawanda gold deposit        | Pyrite       | 0.02  | 1.57   | 0.01        | This study                |
| awanda-25     | Aawanda gold deposit        | Pyrite       | 0.01  | 0.02   | 0.72        | This study                |
| awanda-01     | Aawanda gold deposit        | Arsenopyrite | 2.00  | 0.44   | 4.59        | This study                |
| awanda-05     | Aawanda gold deposit        | Arsenopyrite | 0.22  | 1.06   | 0.21        | This study                |
| awanda-13     | Aawanda gold deposit        | Arsenopyrite | 0.07  | 0.06   | 1.08        | This study                |
| awanda-14     | Aawanda gold deposit        | Arsenopyrite | 0.39  | 0.44   | 0.88        | This study                |
| awanda-18     | Aawanda gold deposit        | Arsenopyrite | 0.02  | 0.14   | 0.18        | This study                |
| P1            | Patagonian mantle xenoliths | Pyrite       | 0.67  | 0.7    | 0.96        | Tassara et al., 2017 [11] |
| P2            | Patagonian mantle xenoliths | Pyrite       | 5.96  | 23.09  | 0.26        | Tassara et al., 2017 [11] |
| P3            | Patagonian mantle xenoliths | Pyrite       | 4.4   | 162.96 | 0.03        | Tassara et al., 2017 [11] |
| P4            | Patagonian mantle xenoliths | Pyrite       | 0     | 49.31  | 0.00        | Tassara et al., 2017 [11] |
| P5            | Patagonian mantle xenoliths | Pyrite       | 0     | 42.9   | 0.00        | Tassara et al., 2017 [11] |
| P6            | Patagonian mantle xenoliths | Pyrite       | 3.54  | 64.24  | 0.06        | Tassara et al., 2017 [11] |
| P7            | Patagonian mantle xenoliths | Pyrite       | 0.02  | 0.1    | 0.20        | Tassara et al., 2017 [11] |
| P8            | Patagonian mantle xenoliths | Pyrite       | 0.37  | 3.22   | 0.11        | Tassara et al., 2017 [11] |
| P9            | Patagonian mantle xenoliths | Pyrite       | 0.05  | 2.44   | 0.02        | Tassara et al., 2017 [11] |
| S1-3-1        | Sanshandao                  | Pyrite       | 0.73  | 3.01   | 0.24        | Deng et al., 2020 [12]    |
| S1-2-1        | Sanshandao                  | Pyrite       | 0.22  | 1.12   | 0.20        | Deng et al., 2020 [12]    |
| S1-5-2        | Sanshandao                  | Pyrite       | 0.07  | 0.51   | 0.14        | Deng et al., 2020 [12]    |
| S1-4-1        | Sanshandao                  | Pyrite       | 0.32  | 2.74   | 0.12        | Deng et al., 2020 [12]    |
| S1-4-2        | Sanshandao                  | Pyrite       | 0.2   | 2.49   | 0.08        | Deng et al., 2020 [12]    |
| S2-2-1        | Sanshandao                  | Pyrite       | 0.16  | 6.21   | 0.03        | Deng et al., 2020 [12]    |
| S2-4-1        | Sanshandao                  | Pyrite       | 0.25  | 0.8    | 0.31        | Deng et al., 2020 [12]    |
| S2-5-1        | Sanshandao                  | Pyrite       | 0.99  | 0.32   | 3.09        | Deng et al., 2020 [12]    |
| S2-1-1        | Sanshandao                  | Pyrite       | 0.06  | 0.47   | 0.13        | Deng et al., 2020 [12]    |
| S2-1-2        | Sanshandao                  | Pyrite       | 0.05  | 0.11   | 0.45        | Deng et al., 2020 [12]    |
| S3-4-1        | Sanshandao                  | Pyrite       | 0.45  | 2.85   | 0.16        | Deng et al., 2020 [12]    |

|         |            |        |      |       |       |                        |
|---------|------------|--------|------|-------|-------|------------------------|
| S3-5-1  | Sanshandao | Pyrite | 0.27 | 19.66 | 0.01  | Deng et al., 2020 [12] |
| S3-3-1  | Sanshandao | Pyrite | 0.08 | 4.06  | 0.02  | Deng et al., 2020 [12] |
| S4-1-1  | Sanshandao | Pyrite | 0.91 | 15.06 | 0.06  | Deng et al., 2020 [12] |
| S4-1-2  | Sanshandao | Pyrite | 1.5  | 3.21  | 0.47  | Deng et al., 2020 [12] |
| S4-1-3  | Sanshandao | Pyrite | 0.92 | 11.11 | 0.08  | Deng et al., 2020 [12] |
| S4-3-1  | Sanshandao | Pyrite | 0.99 | 0.09  | 11.00 | Deng et al., 2020 [12] |
| S4-3-2  | Sanshandao | Pyrite | 1.1  | 9.99  | 0.11  | Deng et al., 2020 [12] |
| S4-3-3  | Sanshandao | Pyrite | 0.91 | 1.46  | 0.62  | Deng et al., 2020 [12] |
| S4-3-4  | Sanshandao | Pyrite | 0.04 | 29.99 | 0.00  | Deng et al., 2020 [12] |
| S6-2-1  | Sanshandao | Pyrite | 0.05 | 0.37  | 0.14  | Deng et al., 2020 [12] |
| S6-2-3  | Sanshandao | Pyrite | 0.25 | 28.74 | 0.01  | Deng et al., 2020 [12] |
| S6-1-1  | Sanshandao | Pyrite | 0.06 | 0.73  | 0.08  | Deng et al., 2020 [12] |
| S6-1-2  | Sanshandao | Pyrite | 0.02 | 0.42  | 0.05  | Deng et al., 2020 [12] |
| S6-1-3  | Sanshandao | Pyrite | 0.12 | 0.41  | 0.29  | Deng et al., 2020 [12] |
| S6-3-2  | Sanshandao | Pyrite | 2.02 | 0.33  | 6.12  | Deng et al., 2020 [12] |
| S6-3-3  | Sanshandao | Pyrite | 0.74 | 1.02  | 0.73  | Deng et al., 2020 [12] |
| S7-2-2  | Sanshandao | Pyrite | 0.03 | 3.1   | 0.01  | Deng et al., 2020 [12] |
| S7-1-1  | Sanshandao | Pyrite | 4.3  | 0.76  | 5.66  | Deng et al., 2020 [12] |
| S7-1-2  | Sanshandao | Pyrite | 0.04 | 2.29  | 0.02  | Deng et al., 2020 [12] |
| S7-1-3  | Sanshandao | Pyrite | 0.09 | 1.87  | 0.05  | Deng et al., 2020 [12] |
| S8-1-1  | Sanshandao | Pyrite | 0.58 | 0.12  | 4.83  | Deng et al., 2020 [12] |
| S8-1-2  | Sanshandao | Pyrite | 0.07 | 0.57  | 0.12  | Deng et al., 2020 [12] |
| S8-1-3  | Sanshandao | Pyrite | 0.17 | 0.04  | 4.25  | Deng et al., 2020 [12] |
| S8-2-1  | Sanshandao | Pyrite | 0.31 | 15.93 | 0.02  | Deng et al., 2020 [12] |
| S8-2-2  | Sanshandao | Pyrite | 0.47 | 39.19 | 0.01  | Deng et al., 2020 [12] |
| S9-2-1  | Sanshandao | Pyrite | 0.17 | 0.3   | 0.57  | Deng et al., 2020 [12] |
| S9-2-2  | Sanshandao | Pyrite | 0.08 | 0.55  | 0.15  | Deng et al., 2020 [12] |
| S9-2-3  | Sanshandao | Pyrite | 0.07 | 1.38  | 0.05  | Deng et al., 2020 [12] |
| S9-1-1  | Sanshandao | Pyrite | 2.94 | 2.42  | 1.21  | Deng et al., 2020 [12] |
| S9-1-2  | Sanshandao | Pyrite | 0.13 | 5.51  | 0.02  | Deng et al., 2020 [12] |
| S13 (?) | Sanshandao | Pyrite | 0.36 | 2.39  | 0.15  | Deng et al., 2020 [12] |
| S13-2-1 | Sanshandao | Pyrite | 0.03 | 0.06  | 0.50  | Deng et al., 2020 [12] |
| S13-2-3 | Sanshandao | Pyrite | 0.02 | 3.65  | 0.01  | Deng et al., 2020 [12] |
| S13-1-1 | Sanshandao | Pyrite | 0.09 | 22.64 | 0.00  | Deng et al., 2020 [12] |
| S13-1-2 | Sanshandao | Pyrite | 0.02 | 4.36  | 0.00  | Deng et al., 2020 [12] |
| S13-1-3 | Sanshandao | Pyrite | 0.51 | 32.05 | 0.02  | Deng et al., 2020 [12] |
| S14-1-1 | Sanshandao | Pyrite | 0.1  | 0.93  | 0.11  | Deng et al., 2020 [12] |
| S14-1-2 | Sanshandao | Pyrite | 0.37 | 74.65 | 0.00  | Deng et al., 2020 [12] |

|              |            |        |       |       |       |                         |
|--------------|------------|--------|-------|-------|-------|-------------------------|
| S14-1-3      | Sanshandao | Pyrite | 0.02  | 2.37  | 0.01  | Deng et al., 2020 [12]  |
| S14-2-1      | Sanshandao | Pyrite | 0.3   | 1.18  | 0.25  | Deng et al., 2020 [12]  |
| S14-2-2      | Sanshandao | Pyrite | 0.03  | 0.15  | 0.20  | Deng et al., 2020 [12]  |
| S14-2-3      | Sanshandao | Pyrite | 0.21  | 1.45  | 0.14  | Deng et al., 2020 [12]  |
| S18-5-1      | Sanshandao | Pyrite | 0.15  | 0.05  | 3.00  | Deng et al., 2020 [12]  |
| S19-4-2      | Sanshandao | Pyrite | 0.02  | 4.96  | 0.00  | Deng et al., 2020 [12]  |
| S19-4-3      | Sanshandao | Pyrite | 0.02  | 0.12  | 0.17  | Deng et al., 2020 [12]  |
| S19-3-2      | Sanshandao | Pyrite | 0.04  | 0.42  | 0.10  | Deng et al., 2020 [12]  |
| S19-3-3      | Sanshandao | Pyrite | 0.01  | 0.43  | 0.02  | Deng et al., 2020 [12]  |
| S20-5-1      | Sanshandao | Pyrite | 0.07  | 0.84  | 0.08  | Deng et al., 2020 [12]  |
| S20-5-2      | Sanshandao | Pyrite | 0.1   | 0.46  | 0.22  | Deng et al., 2020 [12]  |
| S20-2-1      | Sanshandao | Pyrite | 0.09  | 0.34  | 0.26  | Deng et al., 2020 [12]  |
| S20-2-2      | Sanshandao | Pyrite | 0.06  | 0.39  | 0.15  | Deng et al., 2020 [12]  |
| 17LL10-1B-01 | Linglong   | Pyrite | 0.008 | 0.382 | 0.02  | Wang et al., 2022 [4]   |
| 17LL10-1B-03 | Linglong   | Pyrite | 0.004 | 0.464 | 0.01  | Wang et al., 2022 [4]   |
| 17LL10-1B-06 | Linglong   | Pyrite | 0.005 | 0.049 | 0.10  | Wang et al., 2022 [4]   |
| 17LL10-1B-08 | Linglong   | Pyrite | 0.004 | 2.45  | 0.00  | Wang et al., 2022 [4]   |
| 17LL10-1B-09 | Linglong   | Pyrite | 0.010 | 1.28  | 0.01  | Wang et al., 2022 [4]   |
| 17LL10-1B-11 | Linglong   | Pyrite | 0.017 | 0.243 | 0.07  | Wang et al., 2022 [4]   |
| 17LL10-1B-12 | Linglong   | Pyrite | 0.029 | 0.179 | 0.16  | Wang et al., 2022 [4]   |
| 17LL10-1B-17 | Linglong   | Pyrite | 0.006 | 1.08  | 0.01  | Wang et al., 2022 [4]   |
| 17LL10-1B-24 | Linglong   | Pyrite | 0.009 | 0.025 | 0.36  | Wang et al., 2022 [4]   |
| 17LL10-1B-25 | Linglong   | Pyrite | 0.014 | 0.022 | 0.63  | Wang et al., 2022 [4]   |
| 17LL10-1B-29 | Linglong   | Pyrite | 0.008 | 2.92  | 0.00  | Wang et al., 2022 [4]   |
| HLOG-01      | Heilangou  | Pyrite | 73    | 286   | 0.26  | Li et al., 2022 [13,14] |
| HLOG-02      | Heilangou  | Pyrite | 14.9  | 89    | 0.17  | Li et al., 2022 [13,14] |
| HLOG-03      | Heilangou  | Pyrite | 67.1  | 34    | 1.97  | Li et al., 2022 [13,14] |
| HLOG-04      | Heilangou  | Pyrite | 53.4  | 35    | 1.53  | Li et al., 2022 [13,14] |
| HLOG-05      | Heilangou  | Pyrite | 92.8  | 6.6   | 14.06 | Li et al., 2022 [13,14] |
| HLOG-06      | Heilangou  | Pyrite | 6.8   | 48.1  | 0.14  | Li et al., 2022 [13,14] |
| HLOG-07      | Heilangou  | Pyrite | 2.08  | 13.6  | 0.15  | Li et al., 2022 [13,14] |
| HLOG-08      | Heilangou  | Pyrite | 3.08  | 125   | 0.02  | Li et al., 2022 [13,14] |
| HLOG-09      | Heilangou  | Pyrite | 10.1  | 36.2  | 0.28  | Li et al., 2022 [13,14] |
| HLOG-10      | Heilangou  | Pyrite | 1.85  | 77    | 0.02  | Li et al., 2022 [13,14] |
| HLOG-11      | Heilangou  | Pyrite | 2.25  | 4.3   | 0.52  | Li et al., 2022 [13,14] |
| HLOG-12      | Heilangou  | Pyrite | 0.43  | 5.8   | 0.07  | Li et al., 2022 [13,14] |
| HLOG-13      | Heilangou  | Pyrite | 2.99  | 0.6   | 4.98  | Li et al., 2022 [13,14] |
| HLOG-16      | Heilangou  | Pyrite | 0.12  | 0.2   | 0.60  | Li et al., 2022 [13,14] |

|               |           |        |       |        |       |                         |
|---------------|-----------|--------|-------|--------|-------|-------------------------|
| HLOG-17       | Heilangou | Pyrite | 6.15  | 7.8    | 0.79  | Li et al., 2022 [13,14] |
| HLOG-18       | Heilangou | Pyrite | 14.1  | 1.2    | 11.75 | Li et al., 2022 [13,14] |
| HLOG-26       | Heilangou | Pyrite | 1.38  | 32.1   | 0.04  | Li et al., 2022 [13,14] |
| HLOG-27       | Heilangou | Pyrite | 2.38  | 27.1   | 0.09  | Li et al., 2022 [13,14] |
| HLOG-28       | Heilangou | Pyrite | 10.2  | 6.7    | 1.52  | Li et al., 2022 [13,14] |
| HLOG-29       | Heilangou | Pyrite | 17.7  | 10     | 1.77  | Li et al., 2022 [13,14] |
| HLOG-30       | Heilangou | Pyrite | 0.96  | 33.4   | 0.03  | Li et al., 2022 [13,14] |
| HLOG-31       | Heilangou | Pyrite | 2.22  | 24     | 0.09  | Li et al., 2022 [13,14] |
| HLOG-32       | Heilangou | Pyrite | 7.1   | 490    | 0.01  | Li et al., 2022 [13,14] |
| HLOG-33       | Heilangou | Pyrite | 5.5   | 123    | 0.04  | Li et al., 2022 [13,14] |
| HLOG-34       | Heilangou | Pyrite | 21.2  | 158    | 0.13  | Li et al., 2022 [13,14] |
| XC10D202B1-1  | Xincheng  | Pyrite | 0.016 | 1.46   | 0.01  | Yang et al., 2016 [15]  |
| XC10D202B1-2  | Xincheng  | Pyrite | 0.061 | 2.17   | 0.03  | Yang et al., 2016 [15]  |
| XC10D202B1-4  | Xincheng  | Pyrite | 0.035 | 1.19   | 0.03  | Yang et al., 2016 [15]  |
| XC10D210B5-1  | Xincheng  | Pyrite | 1.14  | 29.1   | 0.04  | Yang et al., 2016 [15]  |
| XC10D210B5-2  | Xincheng  | Pyrite | 0.113 | 3.28   | 0.03  | Yang et al., 2016 [15]  |
| XC10D210B5-3  | Xincheng  | Pyrite | 0.14  | 1.85   | 0.08  | Yang et al., 2016 [15]  |
| XC10D212B4-1  | Xincheng  | Pyrite | 0.281 | 5.41   | 0.05  | Yang et al., 2016 [15]  |
| XC10D212B4-2  | Xincheng  | Pyrite | 0.117 | 0.6    | 0.20  | Yang et al., 2016 [15]  |
| XC10D211B4-1  | Xincheng  | Pyrite | 0.495 | 58.4   | 0.01  | Yang et al., 2016 [15]  |
| XC10D211B4-2  | Xincheng  | Pyrite | 0.166 | 10.7   | 0.02  | Yang et al., 2016 [15]  |
| XC10D211B4-3  | Xincheng  | Pyrite | 0.019 | 0.57   | 0.03  | Yang et al., 2016 [15]  |
| XC10D211B4-4  | Xincheng  | Pyrite | 0.254 | 0.57   | 0.45  | Yang et al., 2016 [15]  |
| XC10D211B4-5  | Xincheng  | Pyrite | 3,759 | 4,937  | 0.76  | Yang et al., 2016 [15]  |
| XC10D211B4-6  | Xincheng  | Pyrite | 0.211 | 78.6   | 0.00  | Yang et al., 2016 [15]  |
| XC10D211B4-7  | Xincheng  | Pyrite | 0.195 | 26.9   | 0.01  | Yang et al., 2016 [15]  |
| XC10D224B3-1  | Xincheng  | Pyrite | 0.323 | 7.59   | 0.04  | Yang et al., 2016 [15]  |
| XC10D224B3-2  | Xincheng  | Pyrite | 3.610 | 15.900 | 0.23  | Yang et al., 2016 [15]  |
| XC10D007B7-2  | Xincheng  | Pyrite | 0.02  | 0.35   |       | Yang et al., 2016 [15]  |
| XC10D007B7-3  | Xincheng  | Pyrite | 0.03  | 0.25   |       | Yang et al., 2016 [15]  |
| XC10D007B7-4  | Xincheng  | Pyrite | 0.06  | 7.82   |       | Yang et al., 2016 [15]  |
| XC10D007B7-5  | Xincheng  | Pyrite | 0.08  | 5.2    |       | Yang et al., 2016 [15]  |
| XC10D007B7-7  | Xincheng  | Pyrite | 0.02  | 0.7    |       | Yang et al., 2016 [15]  |
| XC10D007B7-8  | Xincheng  | Pyrite | 0.02  | 0.16   |       | Yang et al., 2016 [15]  |
| XC10D007B7-9  | Xincheng  | Pyrite | 0.02  | 0.08   |       | Yang et al., 2016 [15]  |
| XC10D007B7-10 | Xincheng  | Pyrite | 0.04  | 0.63   |       | Yang et al., 2016 [15]  |
| XC10D007B7-11 | Xincheng  | Pyrite | 0.01  | 0.35   |       | Yang et al., 2016 [15]  |
| XC10D203B1-1  | Xincheng  | Pyrite | 0.36  | 31.1   |       | Yang et al., 2016 [15]  |

|               |          |        |       |       |      |                        |
|---------------|----------|--------|-------|-------|------|------------------------|
| XC10D203B1-2  | Xincheng | Pyrite | 0.16  | 2.89  |      | Yang et al., 2016 [15] |
| XC10D203B1-3  | Xincheng | Pyrite | 0.37  | 12.1  |      | Yang et al., 2016 [15] |
| XD10D207B1-1  | Xincheng | Pyrite | 0.14  | 1.8   |      | Yang et al., 2016 [15] |
| XD10D207B1-2  | Xincheng | Pyrite | 0.05  | 0.63  |      | Yang et al., 2016 [15] |
| XD10D207B1-3  | Xincheng | Pyrite | 0.10  | 4.48  |      | Yang et al., 2016 [15] |
| XC10D207B3-1  | Xincheng | Pyrite | 0.12  | 12.5  |      | Yang et al., 2016 [15] |
| XC10D207B3-2  | Xincheng | Pyrite | 0.10  | 140   |      | Yang et al., 2016 [15] |
| XC10D207B3-3  | Xincheng | Pyrite | 0.01  | 0.67  |      | Yang et al., 2016 [15] |
| XC10D211B18-1 | Xincheng | Pyrite | 0.23  | 1.3   |      | Yang et al., 2016 [15] |
| XC10D211B18-2 | Xincheng | Pyrite | 0.16  | 1.82  |      | Yang et al., 2016 [15] |
| XC10D211B18-3 | Xincheng | Pyrite | 0.34  | 2.63  |      | Yang et al., 2016 [15] |
| XC10D007B11-1 | Xincheng | Pyrite | 0.03  | 0.64  |      | Yang et al., 2016 [15] |
| XC10D007B11-2 | Xincheng | Pyrite | 0.03  | 0.42  |      | Yang et al., 2016 [15] |
| XC10D007B11-3 | Xincheng | Pyrite | 0.02  | 0.65  |      | Yang et al., 2016 [15] |
| XC10D211B14-1 | Xincheng | Pyrite | 0.21  | 4.14  |      | Yang et al., 2016 [15] |
| XC10D211B14-2 | Xincheng | Pyrite | 0.24  | 4.54  |      | Yang et al., 2016 [15] |
| XC10D211B14-3 | Xincheng | Pyrite | 0.58  | 44.8  |      | Yang et al., 2016 [15] |
| XC10D215B1-1  | Xincheng | Pyrite | 0.06  | 18.2  |      | Yang et al., 2016 [15] |
| XC10D215B1-2  | Xincheng | Pyrite | 0.05  | 13.4  |      | Yang et al., 2016 [15] |
| XC10D204B6-1  | Xincheng | Pyrite | 9.27  | 668   |      | Yang et al., 2016 [15] |
| XC10D204B6-2  | Xincheng | Pyrite | 0.02  | 0.03  |      | Yang et al., 2016 [15] |
| XC10D204B6-3  | Xincheng | Pyrite | 0.12  | 4.04  |      | Yang et al., 2016 [15] |
| XC10D204B6-4  | Xincheng | Pyrite | 0.17  | 0.05  |      | Yang et al., 2016 [15] |
| XC10D204B6-5  | Xincheng | Pyrite | 0.03  | 0.2   |      | Yang et al., 2016 [15] |
| XC10D007B7-12 | Xincheng | Pyrite | 0.03  | 21    |      | Yang et al., 2016 [15] |
| XC10D007B7-13 | Xincheng | Pyrite | 0.04  | 88.7  |      | Yang et al., 2016 [15] |
| XC10D007B7-14 | Xincheng | Pyrite | 0.04  | 6.82  |      | Yang et al., 2016 [15] |
| 20QC-13-01    | Qianchen | Pyrite | 0.018 | 0.132 | 0.13 | Wu et al., 2022 [16]   |
| 20QC-13-03    | Qianchen | Pyrite | 0.003 | 0.072 | 0.05 | Wu et al., 2022 [16]   |
| 20QC-13-04    | Qianchen | Pyrite | 0.007 | 0.127 | 0.06 | Wu et al., 2022 [16]   |
| 20QC-13-05    | Qianchen | Pyrite | 0.012 | 0.491 | 0.02 | Wu et al., 2022 [16]   |
| 20QC-8-2-01   | Qianchen | Pyrite | 0.088 | 1.049 | 0.08 | Wu et al., 2022 [16]   |
| 20QC-8-2-02   | Qianchen | Pyrite | 0.002 | 0.144 | 0.01 | Wu et al., 2022 [16]   |
| 20QC-8-2-03   | Qianchen | Pyrite | 0.084 | 0.699 | 0.12 | Wu et al., 2022 [16]   |
| 20QC-8-2-04   | Qianchen | Pyrite | 0.034 | 0.572 | 0.06 | Wu et al., 2022 [16]   |
| 20QC-8-2-05   | Qianchen | Pyrite | 0.004 | 0.016 | 0.23 | Wu et al., 2022 [16]   |
| 20QC-25-01    | Qianchen | Pyrite | 0.308 | 0.431 | 0.72 | Wu et al., 2022 [16]   |
| 20QC-25-04    | Qianchen | Pyrite | 0.010 | 0.050 | 0.21 | Wu et al., 2022 [16]   |

|               |          |        |       |       |      |                      |
|---------------|----------|--------|-------|-------|------|----------------------|
| 20QC-27-01    | Qianchen | Pyrite | 0.006 | 0.301 | 0.02 | Wu et al., 2022 [16] |
| 20QC-27-02    | Qianchen | Pyrite | 0.002 | 1.102 | 0.00 | Wu et al., 2022 [16] |
| 20QC-27-03    | Qianchen | Pyrite | 0.043 | 1.535 | 0.03 | Wu et al., 2022 [16] |
| 20QC-27-05    | Qianchen | Pyrite | 0.003 | 0.198 | 0.02 | Wu et al., 2022 [16] |
| A1547-E-Py1   | Zhaoxian | Pyrite | 0.17  | 0.49  | 0.35 | Li et al., 2021 [17] |
| A1547-E-Py3   | Zhaoxian | Pyrite | 0.14  | 0.57  | 0.24 | Li et al., 2021 [17] |
| A1547-E-Py4   | Zhaoxian | Pyrite | 0.06  | 0.27  | 0.24 | Li et al., 2021 [17] |
| A1547-E-Py01  | Zhaoxian | Pyrite | 0.12  | 0.36  | 0.33 | Li et al., 2021 [17] |
| A1547-E-Py03  | Zhaoxian | Pyrite | 0.05  | 0.09  | 0.51 | Li et al., 2021 [17] |
| A1547-E-Py04  | Zhaoxian | Pyrite | 0.02  | 0.24  | 0.10 | Li et al., 2021 [17] |
| T10           | Zhaoxian | Pyrite | 0.46  | 5.83  | 0.08 | Li et al., 2021 [17] |
| A1515B-F-Py7  | Zhaoxian | Pyrite | 0.04  | 4.39  | 0.01 | Li et al., 2021 [17] |
| A1515B-F-Py8  | Zhaoxian | Pyrite | 0.05  | 1.70  | 0.03 | Li et al., 2021 [17] |
| A1515B-F-Py10 | Zhaoxian | Pyrite | 0.28  | 10.25 | 0.03 | Li et al., 2021 [17] |
| A1526-D-Py2   | Zhaoxian | Pyrite | 0.12  | 17.60 | 0.01 | Li et al., 2021 [17] |
| A1526-D-Py4   | Zhaoxian | Pyrite | 0.07  | 3.95  | 0.02 | Li et al., 2021 [17] |
| A1526-D-Py5   | Zhaoxian | Pyrite | 0.07  | 3.86  | 0.02 | Li et al., 2021 [17] |
| A1507-C-Py02  | Zhaoxian | Pyrite | 0.03  | 5.22  | 0.01 | Li et al., 2021 [17] |
| A1507-C-Py03  | Zhaoxian | Pyrite | 0.19  | 16.00 | 0.01 | Li et al., 2021 [17] |
| A1507-C-Py05  | Zhaoxian | Pyrite | 0.03  | 5.79  | 0.00 | Li et al., 2021 [17] |
| A1515B-F-Py01 | Zhaoxian | Pyrite | 0.03  | 0.21  | 0.16 | Li et al., 2021 [17] |
| A1515B-F-Py06 | Zhaoxian | Pyrite | 0.04  | 3.06  | 0.01 | Li et al., 2021 [17] |
| A1515B-F-Py09 | Zhaoxian | Pyrite | 0.14  | 10.87 | 0.01 | Li et al., 2021 [17] |
| A1526-D-Py04  | Zhaoxian | Pyrite | 0.04  | 3.76  | 0.01 | Li et al., 2021 [17] |
| A1526-D-Py05  | Zhaoxian | Pyrite | 0.09  | 2.48  | 0.04 | Li et al., 2021 [17] |
| B1515-A-Py04  | Zhaoxian | Pyrite | 1.11  | 1.76  | 0.63 | Li et al., 2021 [17] |
| B1515-A-Py05  | Zhaoxian | Pyrite | 0.61  | 1.07  | 0.57 | Li et al., 2021 [17] |
| H1729-a@8     | Zhaoxian | Pyrite | 2.45  | 1.43  | 1.72 | Li et al., 2021 [17] |
| 19ZY03-01     | Linglong | Pyrite | 0.03  | 0.05  | 0.58 | Li et al., 2021 [17] |
| 19ZY03-02     | Linglong | Pyrite | 0.01  | 0.01  | 0.66 | Li et al., 2021 [17] |
| 19ZY03-03     | Linglong | Pyrite | 0.14  | 0.02  | 8.51 | Li et al., 2021 [17] |
| 19ZY03-07     | Linglong | Pyrite | 0.01  | 0.02  | 0.41 | Li et al., 2021 [17] |
| 19ZY14-04     | Linglong | Pyrite | 0.01  | 0.01  | 1.60 | Li et al., 2021 [17] |
| 19ZY14-05     | Linglong | Pyrite | 0.10  | 0.02  | 4.15 | Li et al., 2021 [17] |
| 19ZY01-01     | Linglong | Pyrite | 0.02  | 0.78  | 0.02 | Li et al., 2021 [17] |
| 19ZY01-03     | Linglong | Pyrite | 0.03  | 0.20  | 0.14 | Li et al., 2021 [17] |
| 19ZY07-01     | Linglong | Pyrite | 0.09  | 0.39  | 0.23 | Li et al., 2021 [17] |
| 19ZY07-02     | Linglong | Pyrite | 0.03  | 0.03  | 0.77 | Li et al., 2021 [17] |



|           |               |        |       |      |       |                       |
|-----------|---------------|--------|-------|------|-------|-----------------------|
| 19ZY07-03 | Linglong      | Pyrite | 0.02  | 0.26 | 0.07  | Li et al., 2021 [17]  |
| 19ZY07-04 | Linglong      | Pyrite | 0.01  | 0.08 | 0.13  | Li et al., 2021 [17]  |
| 19ZY07-06 | Linglong      | Pyrite | 0.02  | 0.02 | 0.88  | Li et al., 2021 [17]  |
| 19ZY13-02 | Linglong      | Pyrite | 18.67 | 0.62 | 30.11 | Li et al., 2021 [17]  |
| 19ZY09-04 | Linglong      | Pyrite | 0.12  | 0.35 | 0.34  | Li et al., 2021 [17]  |
| 19ZY09-05 | Linglong      | Pyrite | 0.01  | 0.01 | 1.31  | Li et al., 2021 [17]  |
| 19ZY09-07 | Linglong      | Pyrite | 0.01  | 0.02 | 0.56  | Li et al., 2021 [17]  |
| DY011-2   | Dayingezhuang | Pyrite | 0.01  | 0.03 |       | Lan et al., 2022 [18] |
| DY011-3   | Dayingezhuang | Pyrite | 0.04  | 0.13 |       | Lan et al., 2022 [18] |
| DY012-1   | Dayingezhuang | Pyrite | 0.01  | 0.01 |       | Lan et al., 2022 [18] |
| DY012-2   | Dayingezhuang | Pyrite | 0.04  | 0.62 |       | Lan et al., 2022 [18] |
| DY012-3   | Dayingezhuang | Pyrite | 0.1   | 4.9  |       | Lan et al., 2022 [18] |
| DY012-4   | Dayingezhuang | Pyrite | 0.13  | 93.9 |       | Lan et al., 2022 [18] |
| DY015-1   | Dayingezhuang | Pyrite | 0.01  | 10.4 |       | Lan et al., 2022 [18] |
| DY015-2   | Dayingezhuang | Pyrite | 0.07  | 8.4  |       | Lan et al., 2022 [18] |
| DY016-1   | Dayingezhuang | Pyrite | 1.2   | 332  |       | Lan et al., 2022 [18] |
| DY016-2   | Dayingezhuang | Pyrite | 0.63  | 227  |       | Lan et al., 2022 [18] |
| DY013-4   | Dayingezhuang | Pyrite | 0.74  | 287  |       | Lan et al., 2022 [18] |
| DY013-5   | Dayingezhuang | Pyrite | 0.32  | 245  |       | Lan et al., 2022 [18] |
| DY017-1   | Dayingezhuang | Pyrite | 0.32  | 529  |       | Lan et al., 2022 [18] |
| DY017-2   | Dayingezhuang | Pyrite | 0.27  | 456  |       | Lan et al., 2022 [18] |
| DY017-3   | Dayingezhuang | Pyrite | 0.04  | 149  |       | Lan et al., 2022 [18] |
| DY017-4   | Dayingezhuang | Pyrite | 0.22  | 45.2 |       | Lan et al., 2022 [18] |
| 02BJ01    | Sizhuang      | Pyrite | 0.04  | 1.38 |       | Liu et al., 2021 [19] |
| 02BJ02    | Sizhuang      | Pyrite | 0.03  | 0.08 |       | Liu et al., 2021 [19] |
| 03T02     | Sizhuang      | Pyrite | 0.02  | 0.13 |       | Liu et al., 2021 [19] |
| 03T03     | Sizhuang      | Pyrite | 0.05  | 0.05 |       | Liu et al., 2021 [19] |
| 06-1J201  | Sizhuang      | Pyrite | 0.03  | 2.32 |       | Liu et al., 2021 [19] |
| 06-BJ05   | Sizhuang      | Pyrite | 0.04  | 0.11 |       | Liu et al., 2021 [19] |
| 06-BJ06   | Sizhuang      | Pyrite | 0.04  | 0.24 |       | Liu et al., 2021 [19] |
| 07J04     | Sizhuang      | Pyrite | 0.02  | 0.07 |       | Liu et al., 2021 [19] |
| 08T01     | Sizhuang      | Pyrite | 0.01  | 0.28 |       | Liu et al., 2021 [19] |
| 08T02     | Sizhuang      | Pyrite | 0.01  | 0.03 |       | Liu et al., 2021 [19] |
| 08T03     | Sizhuang      | Pyrite | 0.03  | 0.76 |       | Liu et al., 2021 [19] |
| 09J04     | Sizhuang      | Pyrite | 0.07  | 13.7 |       | Liu et al., 2021 [19] |
| 09T02     | Sizhuang      | Pyrite | 0.02  | 3.79 |       | Liu et al., 2021 [19] |
| 10AJ01    | Sizhuang      | Pyrite | 0.35  | 0.60 |       | Liu et al., 2021 [19] |
| 10a-j09   | Sizhuang      | Pyrite | 0.09  | 0.62 |       | Liu et al., 2021 [19] |

|         |          |        |      |      |                       |
|---------|----------|--------|------|------|-----------------------|
| 10a-j10 | Sizhuang | Pyrite | 0.11 | 1.94 | Liu et al., 2021 [19] |
| 10AJ206 | Sizhuang | Pyrite | 0.01 | 0.02 | Liu et al., 2021 [19] |
| 10AT01  | Sizhuang | Pyrite | 0.08 | 0.46 | Liu et al., 2021 [19] |
| 11J06   | Sizhuang | Pyrite | 0.02 | 0.92 | Liu et al., 2021 [19] |
| 02B-J02 | Sizhuang | Pyrite | 0.01 | 8.51 | Liu et al., 2021 [19] |
| 02T01   | Sizhuang | Pyrite | 0.02 | 2.00 | Liu et al., 2021 [19] |
| 02T02   | Sizhuang | Pyrite | 0.01 | 0.35 | Liu et al., 2021 [19] |
| 04J212  | Sizhuang | Pyrite | 0.02 | 11.8 | Liu et al., 2021 [19] |
| 06-BJ02 | Sizhuang | Pyrite | 0.05 | 0.16 | Liu et al., 2021 [19] |
| 06-BJ04 | Sizhuang | Pyrite | 0.05 | 10.3 | Liu et al., 2021 [19] |
| L18     | Sizhuang | Pyrite | 0.25 | 5.93 | Liu et al., 2021 [19] |
| 01J01   | Sizhuang | Pyrite | 0.01 | 0.02 | Liu et al., 2021 [19] |
| 02AT01  | Sizhuang | Pyrite | 0.11 | 67.1 | Liu et al., 2021 [19] |
| 02AT02  | Sizhuang | Pyrite | 0.10 | 0.84 | Liu et al., 2021 [19] |
| 02B-J03 | Sizhuang | Pyrite | 0.05 | 23.3 | Liu et al., 2021 [19] |
| 03J01   | Sizhuang | Pyrite | 0.07 | 76.7 | Liu et al., 2021 [19] |
| 03J02   | Sizhuang | Pyrite | 0.02 | 0.50 | Liu et al., 2021 [19] |
| 04TN01  | Sizhuang | Pyrite | 0.02 | 23.3 | Liu et al., 2021 [19] |
| 04TN05  | Sizhuang | Pyrite | 0.01 | 6.45 | Liu et al., 2021 [19] |
| 10AJ201 | Sizhuang | Pyrite | 0.03 | 0.45 | Liu et al., 2021 [19] |
| 10AJ204 | Sizhuang | Pyrite | 0.05 | 0.46 | Liu et al., 2021 [19] |
| L03     | Sizhuang | Pyrite | 0.04 | 13.3 | Liu et al., 2021 [19] |
| L04     | Sizhuang | Pyrite | 0.15 | 48.2 | Liu et al., 2021 [19] |
| L04     | Sizhuang | Pyrite | 0.06 | 17.1 | Liu et al., 2021 [19] |
| L05     | Sizhuang | Pyrite | 0.31 | 5.22 | Liu et al., 2021 [19] |
| L05     | Sizhuang | Pyrite | 0.17 | 91.2 | Liu et al., 2021 [19] |
| L06     | Sizhuang | Pyrite | 0.24 | 5.22 | Liu et al., 2021 [19] |
| L06     | Sizhuang | Pyrite | 0.03 | 17.0 | Liu et al., 2021 [19] |
| L07     | Sizhuang | Pyrite | 0.01 | 0.62 | Liu et al., 2021 [19] |
| L09     | Sizhuang | Pyrite | 0.06 | 13.2 | Liu et al., 2021 [19] |
| L10     | Sizhuang | Pyrite | 0.01 | 7.94 | Liu et al., 2021 [19] |
| L11     | Sizhuang | Pyrite | 0.03 | 2.14 | Liu et al., 2021 [19] |
| L12     | Sizhuang | Pyrite | 0.39 | 1.18 | Liu et al., 2021 [19] |
| L13     | Sizhuang | Pyrite | 0.08 | 2.03 | Liu et al., 2021 [19] |
| L15     | Sizhuang | Pyrite | 0.09 | 0.41 | Liu et al., 2021 [19] |
| L16     | Sizhuang | Pyrite | 0.05 | 39.1 | Liu et al., 2021 [19] |
| L17     | Sizhuang | Pyrite | 0.49 | 0.37 | Liu et al., 2021 [19] |
| 01J03   | Sizhuang | Pyrite | 0.02 | 0.35 | Liu et al., 2021 [19] |

|          |            |        |      |       |                       |
|----------|------------|--------|------|-------|-----------------------|
| 02B-J04  | Sizhuang   | Pyrite | 0.04 | 0.09  | Liu et al., 2021 [19] |
| 04J205   | Sizhuang   | Pyrite | 0.13 | 2.96  | Liu et al., 2021 [19] |
| 04J206   | Sizhuang   | Pyrite | 0.19 | 3.05  | Liu et al., 2021 [19] |
| 04T01    | Sizhuang   | Pyrite | 0.14 | 34.9  | Liu et al., 2021 [19] |
| 04T03    | Sizhuang   | Pyrite | 0.07 | 31.1  | Liu et al., 2021 [19] |
| 04T04    | Sizhuang   | Pyrite | 0.20 | 0.82  | Liu et al., 2021 [19] |
| 04T05    | Sizhuang   | Pyrite | 0.31 | 4.90  | Liu et al., 2021 [19] |
| 04T07    | Sizhuang   | Pyrite | 0.28 | 73.3  | Liu et al., 2021 [19] |
| 04T10    | Sizhuang   | Pyrite | 0.50 | 36.1  | Liu et al., 2021 [19] |
| L08      | Sizhuang   | Pyrite | 0.01 | 6.56  | Liu et al., 2021 [19] |
| L08      | Sizhuang   | Pyrite | 141  | 118.2 | Liu et al., 2021 [19] |
| L14      | Sizhuang   | Pyrite | 0.11 | 51.6  | Liu et al., 2021 [19] |
| 03A1J02  | Sizhuang   | Pyrite | 0.01 | 7.67  | Liu et al., 2021 [19] |
| 03A1J09  | Sizhuang   | Pyrite | 0.61 | 43.5  | Liu et al., 2021 [19] |
| 03A1J11  | Sizhuang   | Pyrite | 0.05 | 3.41  | Liu et al., 2021 [19] |
| 03A1J14  | Sizhuang   | Pyrite | 0.06 | 10.1  | Liu et al., 2021 [19] |
| 03J03    | Sizhuang   | Pyrite | 0.01 | 4.38  | Liu et al., 2021 [19] |
| 03J04    | Sizhuang   | Pyrite | 0.01 | 2.89  | Liu et al., 2021 [19] |
| 03J05    | Sizhuang   | Pyrite | 0.02 | 5.10  | Liu et al., 2021 [19] |
| 03J06    | Sizhuang   | Pyrite | 0.01 | 4.47  | Liu et al., 2021 [19] |
| 03J07    | Sizhuang   | Pyrite | 0.02 | 3.41  | Liu et al., 2021 [19] |
| SSD-2-1  | Sanshandao | Pyrite | 0.02 | 0.10  | Lin et al., 2019 [20] |
| SSD-2-2  | Sanshandao | Pyrite | 0.08 | 3.15  | Lin et al., 2019 [20] |
| SSD-2-3  | Sanshandao | Pyrite | 0.17 | 2.26  | Lin et al., 2019 [20] |
| SSD-2-4  | Sanshandao | Pyrite | 0.16 | 2.77  | Lin et al., 2019 [20] |
| SSD-2-5  | Sanshandao | Pyrite | 0.10 | 14    | Lin et al., 2019 [20] |
| SSD-17-1 | Sanshandao | Pyrite | 0.00 | 0.05  | Lin et al., 2019 [20] |
| SSD-17-2 | Sanshandao | Pyrite | 0.12 | 0.07  | Lin et al., 2019 [20] |
| SSD-2-6  | Sanshandao | Pyrite | 0.22 | 1.57  | Lin et al., 2019 [20] |
| SSD-2-7  | Sanshandao | Pyrite | 0.05 | 0.35  | Lin et al., 2019 [20] |
| SSD-2-8  | Sanshandao | Pyrite | 0.07 | 0.27  | Lin et al., 2019 [20] |
| SSD-9-1  | Sanshandao | Pyrite | 0.15 | 0.74  | Lin et al., 2019 [20] |
| SSD-9-2  | Sanshandao | Pyrite | 0.19 | 2.24  | Lin et al., 2019 [20] |
| SSD-9-3  | Sanshandao | Pyrite | 0.35 | 11.86 | Lin et al., 2019 [20] |
| SSD-9-4  | Sanshandao | Pyrite | 0.08 | 49.61 | Lin et al., 2019 [20] |
| SSD-9-5  | Sanshandao | Pyrite | 0.26 | 2.79  | Lin et al., 2019 [20] |
| SSD-9-6  | Sanshandao | Pyrite | 0.38 | 2.39  | Lin et al., 2019 [20] |
| SSD-9-7  | Sanshandao | Pyrite | 0.06 | 48.77 | Lin et al., 2019 [20] |

|           |            |        |       |       |                       |
|-----------|------------|--------|-------|-------|-----------------------|
| SSD-9-8   | Sanshandao | Pyrite | 0.10  | 4.54  | Lin et al., 2019 [20] |
| SSD-7-1   | Sanshandao | Pyrite | 0.38  | 13.64 | Lin et al., 2019 [20] |
| SSD-7-2   | Sanshandao | Pyrite | 0.12  | 2.92  | Lin et al., 2019 [20] |
| SSD-7-3   | Sanshandao | Pyrite | 0.01  | 4.69  | Lin et al., 2019 [20] |
| SSD-7-4   | Sanshandao | Pyrite | 0.20  | 10.23 | Lin et al., 2019 [20] |
| SSD-7-5   | Sanshandao | Pyrite | 0.09  | 0.52  | Lin et al., 2019 [20] |
| SSD-7-6   | Sanshandao | Pyrite | 0.03  | 0.08  | Lin et al., 2019 [20] |
| SSD-7-7   | Sanshandao | Pyrite | 0.01  | 0.01  | Lin et al., 2019 [20] |
| SSD-17-3  | Sanshandao | Pyrite | 0.84  | 92.78 | Lin et al., 2019 [20] |
| SSD-17-4  | Sanshandao | Pyrite | 0.13  | 1.37  | Lin et al., 2019 [20] |
| SSD-17-5  | Sanshandao | Pyrite | 0.22  | 4.92  | Lin et al., 2019 [20] |
| SSD-17-6  | Sanshandao | Pyrite | 0.38  | 37.61 | Lin et al., 2019 [20] |
| SSD-17-7  | Sanshandao | Pyrite | 0.68  | 37.14 | Lin et al., 2019 [20] |
| SSD-17-8  | Sanshandao | Pyrite | 0.87  | 32.08 | Lin et al., 2019 [20] |
| SSD-17-9  | Sanshandao | Pyrite | 0.04  | 4     | Lin et al., 2019 [20] |
| SSD-17-10 | Sanshandao | Pyrite | 7.80  | 19.68 | Lin et al., 2019 [20] |
| SSD-17-11 | Sanshandao | Pyrite | 0.00  | 1.38  | Lin et al., 2019 [20] |
| SSD-17-12 | Sanshandao | Pyrite | 3.10  | 120   | Lin et al., 2019 [20] |
| SSD-17-13 | Sanshandao | Pyrite | 36.55 | 280   | Lin et al., 2019 [20] |

## References

1. Zhang, C.; Li, Z.; Li, X.; Ye, H. Neoproterozoic mafic dyke swarms at the northern margin of the Tarim Block, NW China: Age, geochemistry, petrogenesis and tectonic implications. *J. Asian Earth Sci.* **2009**, *35*, 167–179. <https://doi.org/10.1016/j.jseaes.2009.02.003>.
2. Cai, Z.; He, B.; Meert, J.G.; Ma, X.; Jiao, C.; Liu, R.; Chen, X.; Yun, X. Neoproterozoic tectonic transition from subduction-related convergence to continental extension of the Tarim Block, NW China. *Precambrian Res.* **2021**, *362*, 106278. <https://doi.org/10.1016/j.precamres.2021.106278>.
3. Deng, J.; Liu, X.; Wang, Q.; Dilek, Y.; Liang, Y. Isotopic characterization and petrogenetic modeling of Early Cretaceous mafic diking—Lithospheric extension in the North China craton, eastern Asia. *GSA Bull.* **2017**, *129*, 1379–1407. <https://doi.org/10.1130/B31609.1>.
4. Wang, X.; Wang, Z.; Cheng, H.; Zong, K.; Wang, C.Y.; Ma, L.; Cai, Y.; Foley, S.; Hu, Z. Gold endowment of the metasomatized lithospheric mantle for giant gold deposits: Insights from lamprophyre dykes. *Geochim. Cosmochim. Acta* **2022**, *316*, 21–40. <https://doi.org/10.1016/j.gca.2021.10.006>.
5. Thompson, J.; Lang, J.; Stanley, C. *Platinum Group Elements in Alkaline Porphyry Deposits, British Columbia*; Exploration and Mining in British Columbia, Mines Branch: 2001.
6. Gao, J.; Zhou, M.; Qi, L.; Chen, W.T.; Huang, X. Chalcophile elemental compositions and origin of the Tuwu porphyry Cu deposit, NW China. *Ore Geol. Rev.* **2015**, *66*, 403–421. <https://doi.org/10.1016/j.oregeorev.2014.08.009>.
7. Gan, T.; Huang, Z. Platinum-group element and Re-Os geochemistry of lamprophyres in the Zhenyuan gold deposit, Yunnan Province, China: Implications for petrogenesis and mantle evolution. *Lithos* **2017**, *282–283*, 228–239. <https://doi.org/10.1016/j.lithos.2017.03.018>.
8. Jowitt, S.M.; Keays, R.R.; Jackson, P.G.; Hoggart, C.R.; Green, A.H. Mineralogical and Geochemical Controls on the Formation of the Woods Point Dike Swarm, Victoria, Australia: Evidence from the Morning Star Dike and Implications for Sourcing of Au Within Orogenic Gold Systems. *Econ. Geol.* **2012**, *107*, 251–273. <https://doi.org/10.2113/econgeo.107.2.251>.

9. Choi, E.; Fiorentini, M.L.; Hughes, H.S.R.; Giuliani, A. Platinum-group element and Au geochemistry of Late Archean to Proterozoic calc-alkaline and alkaline magmas in the Yilgarn Craton, Western Australia. *Lithos* **2020**, *374–375*, 105716. <https://doi.org/10.1016/j.lithos.2020.105716>.
10. Zhang, G.; Xue, C.; Liu, J.; Zhao, X.; Feng, C.; Meng, B. The ore-forming process of the Sawayaerdun gold deposit, western Tianshan, Xinjiang: Constraints from the generation relationship and EMPA, LA-ICP-MS and FESEM analysis of the Pyrite and Arsenopyrite. *Geol. China* **2022**, *49*, 16–35. (In Chinese with English Abstract)
11. Tassara, S.; González-Jiménez, J.M.; Reich, M.; Schilling, M.E.; Morata, D.; Begg, G.; Saunders, E.; Griffin, W.L.O.; Reilly, S.Y.; Grégoire, M.; Barra, F.; Corgne, A. Plume-subduction interaction forms large auriferous provinces. *Nat. Commun.* **2017**, *8*, 843.
12. Deng, J.; Wang, Q.; Santosh, M.; Liu, X.; Liang, Y.; Yang, L.; Zhao, R.; Yang, L. Remobilization of metasomatized mantle lithosphere: A new model for the Jiaodong gold province, eastern China. *Miner. Deposita* **2020**, *55*, 257–274. <https://doi.org/10.1007/s00126-019-00925-0>.
13. Li, X., Fan, H., Zhu, R., Steele-Macinnis, M., Yang, K., Liu, C., Texture, geochemistry, and geochronology of titanite and pyrite: Fingerprint of magmatic-hydrothermal fertile fluids in the Jiaodong Au province. *American Mineralogist*. **2022**, 107(2): 206-220. <https://doi.org/10.2138/am-2021-7889>.
14. Li, X., Wang, Y., Li, Y., Fu, L., Zhang, M., Wu, X., Zhao, Y., Huang, X., Xu, C., Kong, F., Micro-geochemical characteristic of pyrites in the Heilangou gold deposit of penglai area and its implications for ore-forming fluid, Jiaodong gold province. *Geological Bulletin of China*. **2022**, 41(6): 1023-1038. doi: 10.12097/j.issn.1671-2552.2022.06.010.
15. Yang, L., Deng, J., Wang, Z., Guo, L., Li, R., Groves, D.I., Danyushevsky, L.V., Zhang, C., Zheng, X., Zhao, H., Relationships Between Gold and Pyrite at the Xincheng Gold Deposit, Jiaodong Peninsula, China: Implications for Gold Source and Deposition in a Brittle Epizonal Environment. *Economic Geology*. **2016**, 111(1): 105-126. <https://doi.org/10.2113/econgeo.111.1.105>.
16. Wu, J., Zeng, Q., Santosh, M., Fan, H., Bai, R., Li, X., Zhang, Z., Zhang, Y., Huang, L., Deep ore-forming fluid characteristics of the Jiaodong gold province: Evidence from the Qianchen gold deposit in the Jiaojia gold belt. *Ore Geology Reviews*. **2022**, 145: 104911. <https://doi.org/10.1016/j.oregeorev.2022.104911>.
17. Li, Q., Song, H., Chi, G., Zhang, G., Xu, Z., Genesis of visible gold in pyrite in the Zhaoxian gold deposit, Jiaodong gold province, China: Constraints from EBSD micro-structural and LA-ICP-MS elemental analyses. *Ore Geology Reviews*. **2021**, 139: 104591. <https://doi.org/10.1016/j.oregeorev.2021.104591>.
18. Lan, T., Fan, Y., Lu, J., Hao, L., Zhao, X., Sun, X., Guo, J., Hou, Y., Origin of the Dayingezhuang gold deposit in the Jiaodong district, eastern China: Insights from trace element character of pyrite and C-O-S isotope compositions. *Geochemical Exploration*. **2022**, 236: 106986. <https://doi.org/10.1016/j.gexplo.2022.106986>.
19. Liu, Z., Mao, X., Jedermann, A., Bayless, R.C., Deng, H., Chen, J., Xiao, K., Evolution of Pyrite Compositions at the Sizhuang Gold Deposit, Jiaodong Peninsula, Eastern China: Implications for the Genesis of Jiaodong-Type Orogenic Gold Mineralization. *Minerals*. **2021**, 11(4), 344. <https://doi.org/10.3390/min11040344>.
20. Lin, Z., Zhao, X., Xiong, L., In-situ trace element analysis characteristics of pyrite in Sanshandao Gold Deposit in Jiaodong Peninsula: Implications for ore genesis. *Advances in Earth Science*. **2019**, 34(4): 399-413. doi: 10.11867/j.issn.1001-8166.2019.04.0399.
21. Cheng, X.; Wu, H.; Sun, D.; Huang, W.; Chen, H.; Lin, X.; Zhu, K.; Zhang, F. The Permian mafic intrusive events in the northwestern margin of the Tarim Basin and their tectonic significance. *Acta Petrologica Sinica*. **2022**, 38, 743–764. (In Chinese with English abstract)
22. Ding, Q.; Wu, C.; Santosh, M.; Fu, Y.; Dong, L.; Qu, X.; Gu, L. H-O, S and Pb isotope geochemistry of the Awanda gold deposit in southern Tianshan, Central Asian orogenic belt: Implications for fluid regime and metallogeny. *Ore Geol. Rev.* **2014**, 62, 40–53. <https://doi.org/10.1016/j.oregeorev.2014.02.017>.
